1  
2 An objective neurophysiological study of subconcussion in female and male high school student athletes

3  
4  
5 Ryan C.N. D’Arcy<sup>1,2,3\*</sup>, David McCarthy<sup>4</sup>, Derek Harrison<sup>4</sup>, Zander Levenberg<sup>4</sup>, Julian Wan<sup>4</sup>, Aidan  
6 Hepburn<sup>4</sup>, Eric D. Kirby<sup>1,5</sup>, Tanja Yardley<sup>6</sup>, Nikita Yamada-Bagg<sup>2</sup>, Shaun D. Fickling<sup>1,2</sup>, Thayne A. Munce<sup>7</sup>,  
7 David W. Dodick<sup>8,9</sup>, Christopher Ahmad<sup>10,11</sup>, & Ken Shubin Stein<sup>9,12</sup>

- 8  
9  
10  
11  
12 1) BrainNET, Health and Technology District, Surrey, BC, Canada;  
13 2) Centre for Neurology Studies, HealthTech Connex, Surrey, BC, Canada;  
14 3) Faculty of Engineering Science, Simon Fraser University, Burnaby, BC, Canada;  
15 4) Brentwood College School, BRAIN team, Mill Bay, BC, Canada;  
16 5) Faculty of Individualized Interdisciplinary Studies, Simon Fraser University, Burnaby, BC,  
17 Canada;  
18 6) Surrey Neuroplasticity Clinic, HealthTech Connex, Surrey, BC, Canada;  
19 7) Environmental Influences on Health & Disease Group, Sanford Research, Sioux Falls, SD,  
20 USA;  
21 8) Mayo Clinic College of Medicine, Rochester, MN, USA;  
22 9) Atria Academy of Science and Medicine, New York City, NY, USA;  
23 10) New York Presbyterian Hospital, New York City, NY, USA;  
24 11) Columbia University Irving Medical Center, New York City, NY, USA;  
25 12) Hospital for Special Surgery, New York City, NY, USA.

26  
27  
28 \*Corresponding author: Ryan C.N. D’Arcy, PhD, PIEng, Centre for Neurology Studies, HealthTech Connex,  
29 Surrey, BC Canada [ryan@healthtechconnex.com](mailto:ryan@healthtechconnex.com)

30  
31  
32  
33  
34

## BRENTWOOD Research Study

### Manuscript

## 35 **Abstract**

36 Emerging evidence from neurophysiological brain vital sign studies show repeatable sensitivity  
37 to cumulative subconcussive impairments over a season of contact sports. The current study addressed  
38 the need for a large prospective study comparing a low-contact control group to high-contact group.  
39 Importantly, the study also expanded the scope of neurophysiological changes related to repetitive head  
40 impacts to include female athletes in addition to male athletes. In total, 89 high school student athletes  
41 underwent 231 brain vital sign scans over a full calendar year. The results replicated prior subconcussive  
42 cognitive impairments (N400 delays) and sensory impairments (N100 amplitude reductions) in male  
43 athletes and demonstrated similar subconcussive impairments for the first time in female athletes.  
44 While there was no significant subconcussive difference between female and male athletes, female  
45 athletes show overall larger responses in general. The findings demonstrated that subconcussive  
46 impairments are detectable in a controlled experimental comparison for both female and male high  
47 school athletes. The study highlights the opportunity to monitor subconcussive changes in cognitive  
48 processing for both female and male athletes to help advance prevention, mitigation and management  
49 efforts aimed at reducing athletes' risk of potential long-term negative health outcomes related to  
50 cumulative exposure to repetitive head impacts.

51

## 52 **Introduction**

53

## 54 **Background**

55 Head impact exposure from participating in contact or collision sports is commonly associated  
56 with concussion; however, subconcussion is a growing concern for athletes as well as a developing  
57 research area in parallel (Smith et al. 2019). Subconcussion has been increasingly implicated with potential  
58 short-term consequences on the developing brains and longer-term concerns related to chronic traumatic  
59 encephalopathy (McKee et al. 2009; Guskiewicz et al. 2005; Dioso et al. 2022). Concussion research has  
60 also historically been primarily focused on males (Valera et al. 2021; Snedaker et al. 2022). Therefore,  
61 emerging subconcussive research must be inclusive of both female and male athletes. This is a timely  
62 priority as new intervention options begin to emerge from the clinical trials literature (Breuer et al. 2023).

63 Operationally defined, a subconcussive impact is a mechanical force transmitted to the brain  
64 below the threshold for a diagnosis of an acute concussive injury. The effects of these repetitive head  
65 impacts (RHI) may neither be detectable to players nor to observers; however, it has been shown that RHI  
66 over time can result in both microstructural alterations and functional brain impairment (Mainwaring et  
67 al. 2018). The extent of impairment is highly correlated with the frequency of exposure to these impacts  
68 (Hirad et al. 2019; Saghafi et al. 2018; Fickling et al. 2019; Fickling, Smith, et al. 2021; Fickling, Poel, et al.  
69 2021).

70 Recent research has increasingly focused on the role of cumulative RHI exposure rather than a  
71 concussion as a singular, acute traumatic event. Evidence suggests that even a single practice session  
72 involving head contact, such as heading a ball in soccer, can result in impairment (Nowak et al. 2020).  
73 Magnetic resonance imaging (MRI) studies have demonstrated that players exposed to RHI over the  
74 course of a season of sport show significant structural abnormalities compared to controls over the same

## BRENTWOOD Research Study Manuscript

75 time period (Hirad et al. 2019; Saghafi et al. 2018; Veksler et al. 2020). Both Hirad et al. (2019) and Saghafi  
76 et al. (2018) used diffusion-tensor imaging, an MRI-derived technique, to show abnormalities in the white  
77 matter of a group of football athletes were related to different measures of head impact exposure.  
78 Interestingly, while detecting differences in permeability and white matter microstructure in the brains of  
79 contact sport athletes, Veksler et al. (2020) did not find any statistical differences in blood-brain barrier  
80 permeability between non-contact athletes and non-athlete healthy controls, leading the authors to  
81 merge the groups into a single control group.

82 A major challenge for current medical imaging approaches, including MRI, relates to the need for  
83 accessible, objective, and sensitive measures of subconcussive impacts at points-of-care (PoC). Portable  
84 electroencephalography (EEG) provides the evaluation of individual neurophysiological event-related  
85 potentials (ERPs). These have recently been translated into a brain vital signs framework, facilitating  
86 access to sensitive measures for various PoC applications (Ghosh Hajra et al. 2016). Three well-  
87 established ERP responses are extracted within the brain vital signs framework: 1) the N100 for auditory  
88 sensation (Davis 1939); 2) the P300 for basic attention (Sutton et al. 1967); and 3) the N400 for cognitive  
89 processing (Kutas and Federmeier 2011). Brain vital signs have been successfully implemented in the  
90 evaluation of both concussion and subconcussion (Fickling et al. 2019; Fickling, Smith, et al. 2021; Fickling,  
91 Poel, et al. 2021).

92 Identification of subconcussive cognitive impairments over a season of contact sports was initially  
93 reported in male Junior-A ice hockey players [(Fickling et al. 2019), N=23]. Subsequent studies [(Fickling,  
94 Smith, et al. 2021), N=23; (Fickling, Poel, et al. 2021), N=15; (Breuer et al. 2023), N=30] replicated  
95 and confirmed identification of accumulated subconcussive exposure in male athletes for different age  
96 ranges (12-14, 16-21, & 21-28, respectively) and different contact sports, including ice hockey, tackle  
97 football, and mixed martial arts. Importantly, this work demonstrated strong, significant, and linearly  
98 predictive relationships between brain vital sign changes and exposure to subconcussive impacts  
99 (Fickling, Smith, et al. 2021; Fickling, Poel, et al. 2021). These relationships were demonstrated both  
100 when subconcussive impacts were quantified directly by impact sensors or indirectly by the number of  
101 games and practices played. A pattern of subconcussive changes have emerged, identified by changes in  
102 the N400 (cognitive processing) and N100 (sensory processing). The N400 and N100 components have  
103 been implicated in the rate of information processing and synchronous pyramidal neural activation (Luck  
104 2014): the two are interdependent factors reflecting an association with cognitive processing (Kutas and  
105 Federmeier 2011) and auditory sensation (Davis 1939). While the replications of N400 and N100  
106 subconcussive changes in male athletes are noteworthy, a single prospective study with a large sample  
107 size including female athletes is critical.

108

## 109 Objectives & Hypothesis

110 The study was conducted at Brentwood College School (a Grade 8-12 high school in Mill Bay,  
111 British Columbia, Canada) by student researchers from the Brentwood Research, Action, and Innovation  
112 in Neuroscience (BRAIN) team. Brain vital signs were monitored in 89 female and male high school  
113 students (15-17 years of age) participating in high-contact (e.g. rugby, ice hockey, and soccer) and low-  
114 contact sports (e.g. rowing, climbing, and tennis) over three academic terms across the school year (Figure  
115 1). With respect to matching participants in high-contact versus low-contact sports, Brentwood is a private

## BRENTWOOD Research Study Manuscript

116 boarding school, in which all students follow a structured program with commonly matched ages, daily  
117 schedules, diets, academics, athletics, and sleep routines. The study used a mixed-model, repeated  
118 measures design evaluated across 3 terms before and after each of the three school year terms as well as  
119 after the summer break, resulting in 7 possible scan timepoints. The objectives were to replicate prior  
120 subconcussion findings in male athletes, as well as in female athletes, with the primary hypothesis  
121 predicting that brain vital sign subconcussive differences would be detectable in the comparisons for high-  
122 contact sports relative to low-contact sports. Subsequent analyses were conducted to explore specific  
123 differences between female and male subconcussive and overall neurophysiological results.  
124  
125

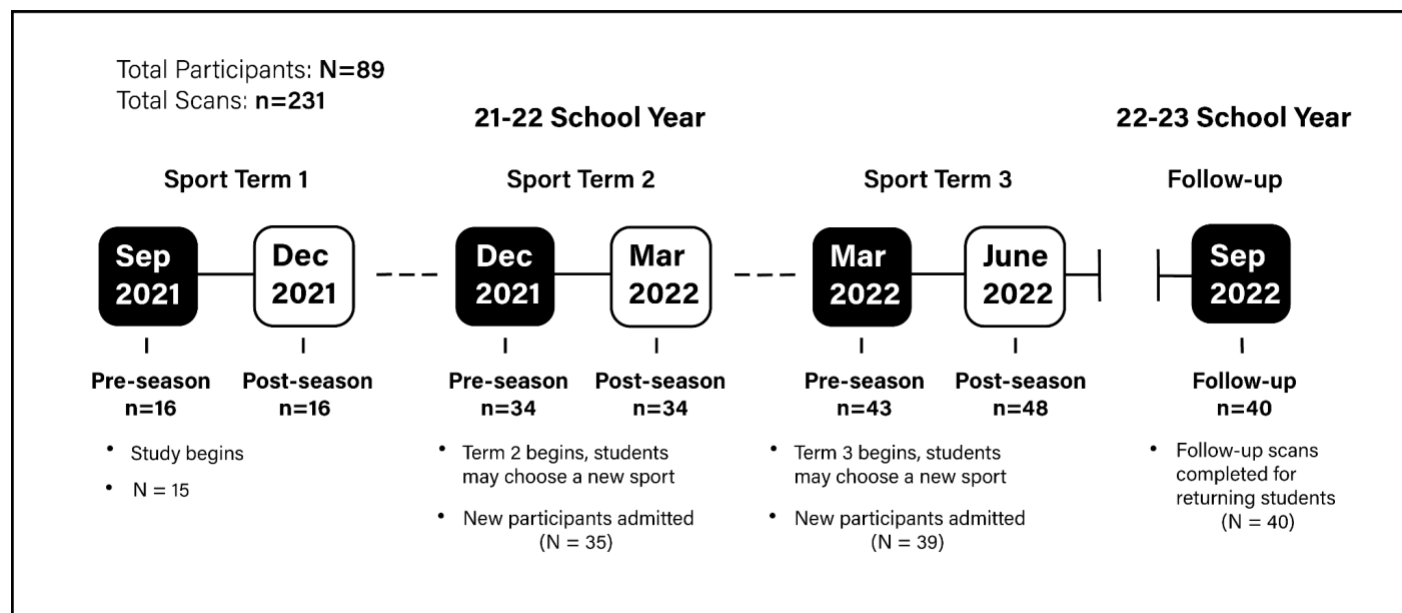

126  
127 **Figure 1:** Overview of the experimental design and study timeline (N: Number of participants; n: brain  
128 vital signs scans completed).  
129  
130

## 131 Results

132  
133 In the current study, 89 female and male student athletes were scanned a total of 231 times  
134 before and after varying terms of contact or non-contact sports. All three brain vital signs, the N100,  
135 P300, and N400, were verified at both the group- and individual- levels. Peak amplitude and latency  
136 values were examined in the multivariate analysis of variance (MANOVA), which were first examined  
137 with univariate tests of normality and Levene's test of equality of error variances. N100 latency and  
138 N400 amplitude failed tests of normality ( $p < 0.05$ ), while all amplitude and latency values passed  
139 Levene's test ( $p > 0.05$ ). Therefore, non-parametric Kruskal-Wallis test results are also included in  
140 Supplemental Data 1 to demonstrate the robustness of the following MANOVA results.  
141

142 High-contact versus low-contact effects:

BRENTWOOD Research Study  
Manuscript

143 Figure 2a shows brain vital sign differences in the N400 latency and N100 amplitude, while  
 144 figure 2b provides the underlying waveform differences. The findings confirmed the consistent  
 145 replication of subconcussive changes in the N400 and N100 at the overall group level, with a significant  
 146 delay in N400 peak latency and a significant increase in N100 peak amplitude. Specifically, the MANOVA  
 147 showed a significant main effect of condition between high- versus low-contact groups [ $F(6,104) = 7.95$ ,  
 148  $p < 0.001$ ,  $\eta_p^2 = 0.314$ ] (Table 1). Separate univariate between-subjects tests on the outcome variables  
 149 revealed significant effects of group on the N400 latency, [ $F(1) = 35.79$ ,  $p < 0.001$ ,  $\eta_p^2 = 0.247$ ], and N100  
 150 amplitude, [ $F(1) = 7.88$ ,  $p = 0.006$ ,  $\eta_p^2 = 0.067$ ] (Figure 2, Table 2). Figure 3 provides the individual scatter  
 151 plot data for both the N400 latency and N100 amplitude effects, including means and standard  
 152 deviations. The current results addressed the planned high- versus low-contact group comparison to  
 153 build on prior pre- versus post- season differences in male athletes. Specific pre- versus post-  
 154 comparisons are provided as Supplemental data for comparison (Supplemental Figure 1).  
 155  
 156

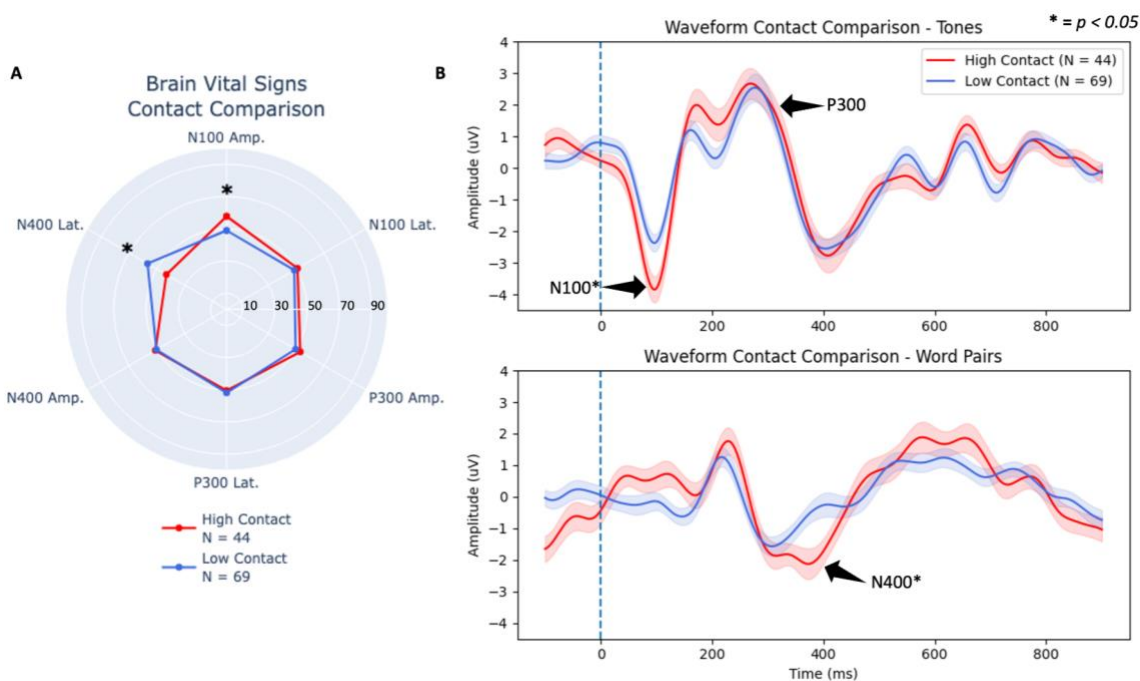

157  
 158 **Figure 2: (A):** Overall group (female and male combined) brain vital sign radar plot comparing high-  
 159 versus low-contact groups. **(B)** Group-level grand average ERP waveforms from tones (top) and word  
 160 pairs (bottom) for overall group comparing high- versus low-contact group differences. Deviant tones  
 161 and incongruent word pair waveforms are plotted, with standard error shaded. N100, P300, and N400  
 162 brain vital sign components of the high-contact group are highlighted with labels and arrows. Asterisks  
 163 denote significant effects in both the brain vital sign and waveform results.  
 164

165 **Table 1:** MANOVA multivariate effect results for high- and low-contact scans.

| MANOVA | DF | PILLAI | F-VALUE | P-VALUE |
|--------|----|--------|---------|---------|
|--------|----|--------|---------|---------|

BRENTWOOD Research Study  
Manuscript

|                    |        |       |              |                   |
|--------------------|--------|-------|--------------|-------------------|
| <i>GROUP</i>       | 6,104  | 0.314 | <b>7.947</b> | <b>&lt;0.001*</b> |
| <i>SEX</i>         | 6, 104 | 0.148 | <b>3.020</b> | <b>0.009*</b>     |
| <i>GROUP X SEX</i> | 6, 104 | 0.003 | 0.047        | 1.000             |

166

167 **Table 2:** MANOVA results for the group effect on each brain vital sign component.

| Brain vital sign      | High-contact mean (standard deviation) | Low-contact mean (standard deviation) | F-value       | p-value           |
|-----------------------|----------------------------------------|---------------------------------------|---------------|-------------------|
| <i>N100 Amplitude</i> | -4.60 (2.82)                           | -3.15 (2.11)                          | <b>7.883</b>  | <b>0.006*</b>     |
| <i>N100 Latency</i>   | 100.78 (16.58)                         | 100.78 (25.64)                        | 0.750         | 0.388             |
| <i>P300 Amplitude</i> | 4.52 (2.84)                            | 3.86 (3.26)                           | 0.508         | 0.477             |
| <i>P300 Latency</i>   | 274.77 (40.03)                         | 270.14 (35.22)                        | 0.304         | 0.583             |
| <i>N400 Amplitude</i> | -3.49 (2.85)                           | -3.35 (2.26)                          | 0.001         | 0.977             |
| <i>N400 Latency</i>   | 433.50 (70.42)                         | 359.16 (57.86)                        | <b>35.786</b> | <b>&lt;0.001*</b> |

168

169

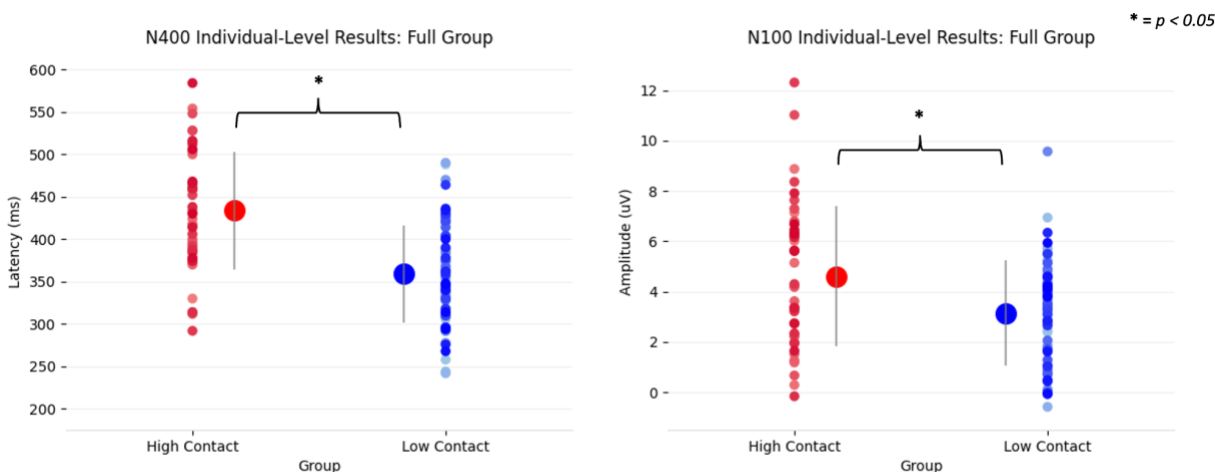

170

171 **Figure 3:** Individual scatter plot data, including group means and standard deviations (middle) showing a  
172 significant N400 latency and N100 amplitude differences for high-contact (red) versus low-contact  
173 (blue).

174

175 Female compared to male subconscious effects:

176 There was no significant sex by contact group interaction present [ $F(6,104) = 0.047, p = 1.00, \eta_p^2 = 0.003$ ] (Table 1), indicating female and male athletes experienced similar subconscious effects. Figure  
177 4a shows brain vital sign radar plots for female and male athletes for high- versus low-contact and figure  
178 4b provides the corresponding waveform results. The MANOVA confirmed a significant main effect for  
179 female athletes compared to male athletes [ $F(6, 104) = 3.02, p = 0.009, \eta_p^2 = 0.148$ ] (Table 1) across  
180 these scans. Separate univariate between-subjects tests revealed significant effects for the P300  
181 amplitude [ $F(1) = 7.45, p = 0.007, \eta_p^2 = 0.064$ ] and N400 amplitude [ $F(1) = 4.71, p = 0.032, \eta_p^2 = 0.041$ ]  
182 (Table 3). Note in Figure 4b that the vertical y-axis (Amplitude) for female athletes and male athletes is  
183

## BRENTWOOD Research Study Manuscript

184 fixed, highlighting the overall increased response amplitude in female responses relative to male  
185 responses across all peaks.  
186

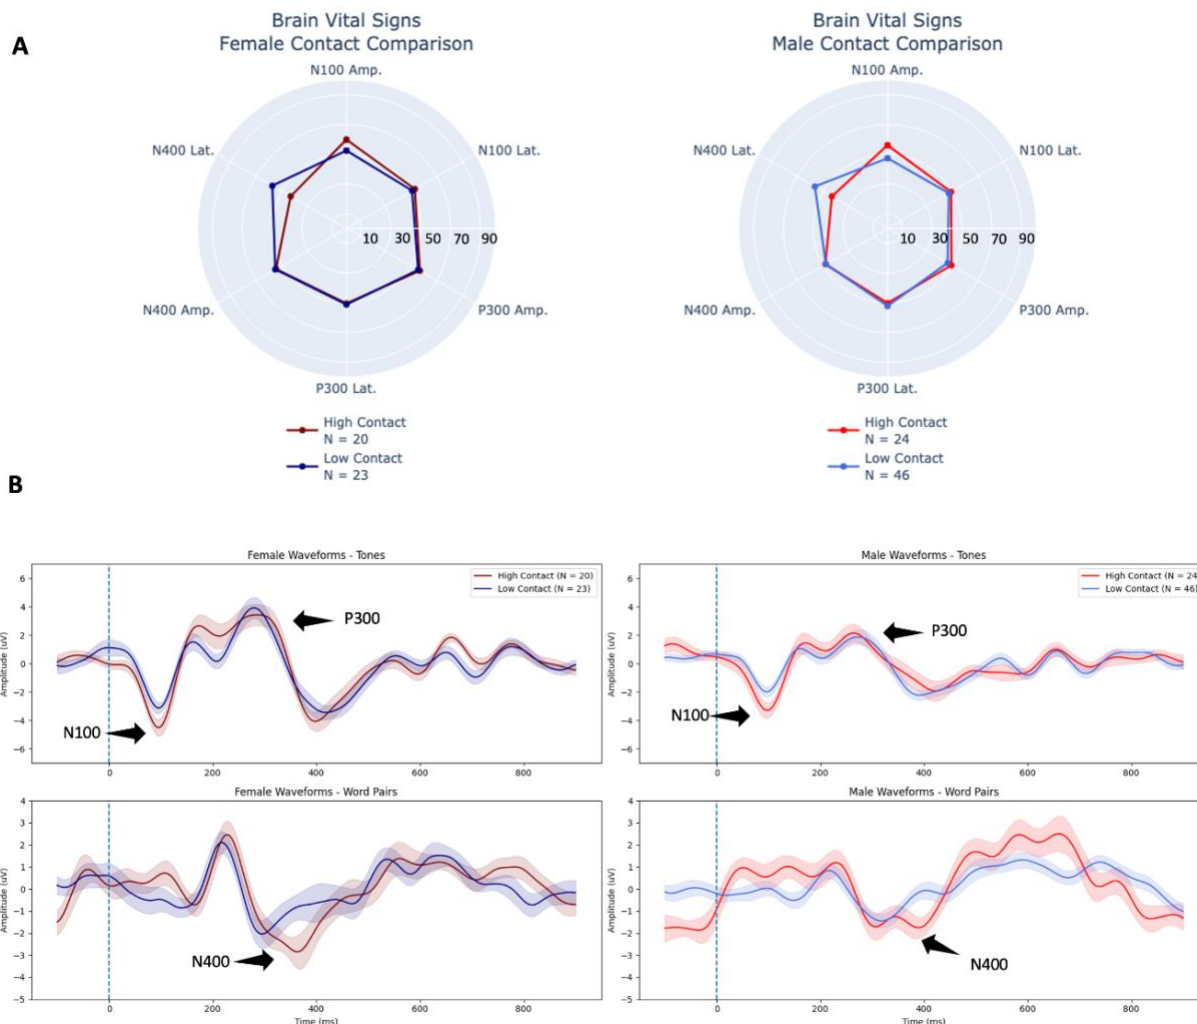

187  
188 **Figure 4: (A)** Radar plots comparing individual-level brain vital signs of the high-contact and low-contact  
189 groups for both female and male athletes. **(B)** Group-level grand average ERP waveforms from tones  
190 (top) and word pairs (bottom) for female athletes (left, dark shading) and male athletes (right, light  
191 shading) comparing high- versus low-contact group differences. Deviant tones and incongruent word  
192 pair waveforms are plotted (with standard error shading). N100, P300, and N400 brain vital sign  
193 components of the high-contact group are highlighted with labels and arrows. Note in Figure 4b that the  
194 vertical y-axis (Amplitude) for female athletes and male athletes is fixed, highlighting the overall  
195 increased response amplitude in female responses relative to male responses across all peaks.  
196

197  
198 **Table 3:** MANOVA results for the main effect of sex on each brain vital sign component (high- and low-  
199 contact scans).

BRENTWOOD Research Study  
Manuscript

| Brain vital sign component | Female athlete mean (standard deviation) | Male athlete mean (standard deviation) | F-value      | p-value       |
|----------------------------|------------------------------------------|----------------------------------------|--------------|---------------|
| N100 Amplitude             | -4.29 (2.47)                             | -3.36 (2.47)                           | 2.427        | 0.122         |
| N100 Latency               | 94.28 (15.32)                            | 101.86 (25.74)                         | 2.597        | 0.110         |
| P300 Amplitude             | 5.18 (3.24)                              | 3.47 (2.85)                            | <b>7.447</b> | <b>0.007*</b> |
| P300 Latency               | 273.21 (37.50)                           | 271.17 (37.04)                         | 0.025        | 0.874         |
| N400 Amplitude             | -4.07 (2.96)                             | -3.00 (2.08)                           | <b>4.707</b> | <b>0.032*</b> |
| N400 Latency               | 391.67 (78.34)                           | 385.91 (69.232)                        | 0.053        | 0.819         |

200  
201  
202  
203  
204  
205  
206  
207  
208  
209  
210  
211  
212  
213

Female compared to male effects:

To further characterize brain vital sign profiles, the multivariate main effect of sex, and the univariate results above (Table 3) for female and male athletes, contact condition was collapsed across high- and low-contact scans to create Figure 5. P300 and N400 amplitude differences accounts for a significant main effect with a near significant effect in the N100 amplitude. The trends driving the main effect can be seen in Figure 6, which showed the individual scatter plots across female athletes and male athletes, including means and standard deviations. To further characterize female and male effects with a larger and closely weighted group number, Figure 7 provides radar plot and waveform results from female and male athletes for all collected scans (N=202 scans). The purpose of this comparison was to include all scans as an evaluation of robust differences between female and male athletes. Corresponding statistics are in Supplemental Data 3.

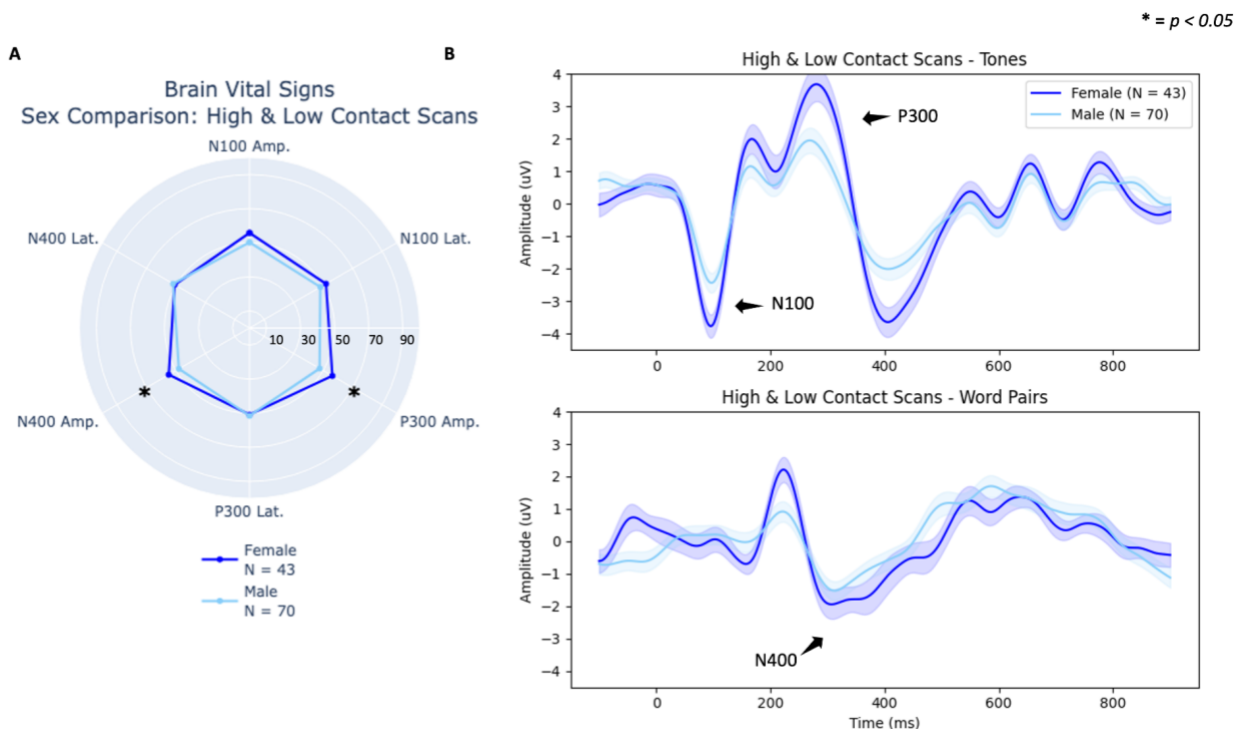

214



## BRENTWOOD Research Study Manuscript

215 **Figure 5:** Comparison of all female and male high- and low-contact scans showing amplitude differences.  
216 **(A)** Radar plot showing overall female and male brain vital sign difference. **(B)** Group-level waveforms  
217 from deviant tones (top) and incongruent word pairs (bottom) are plotted (standard error shading) for  
218 female athletes (dark blue) and male athletes (light blue). N100, P300, and N400 components are  
219 highlighted with arrows.  
220  
221

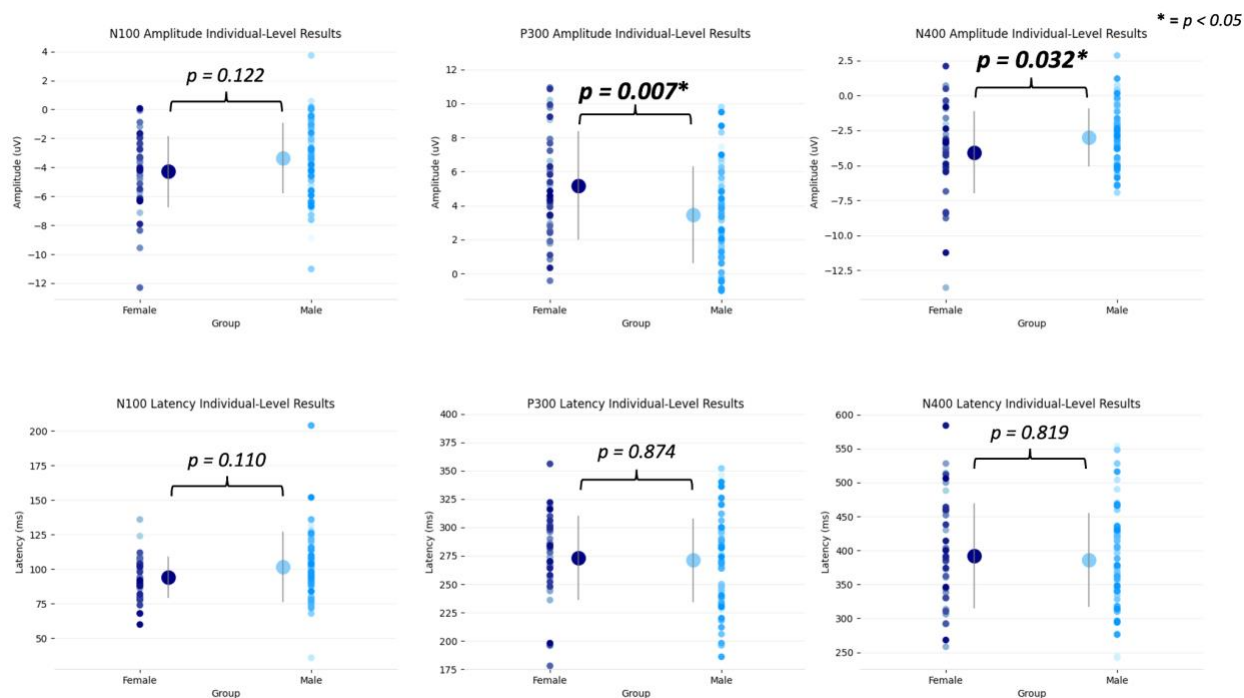

222 **Figure 6:** Scatter plots of individual-level data points for all scans of the amplitudes (top) and latencies  
223 (bottom) for all brain vital signs components in female athletes (left) and male athletes (right).  
224 Significant differences are highlighted by the asterisk, all  $p$ -values are reported as well (Bonferroni  
225 adjusted).  
226  
227  
228

## BRENTWOOD Research Study Manuscript

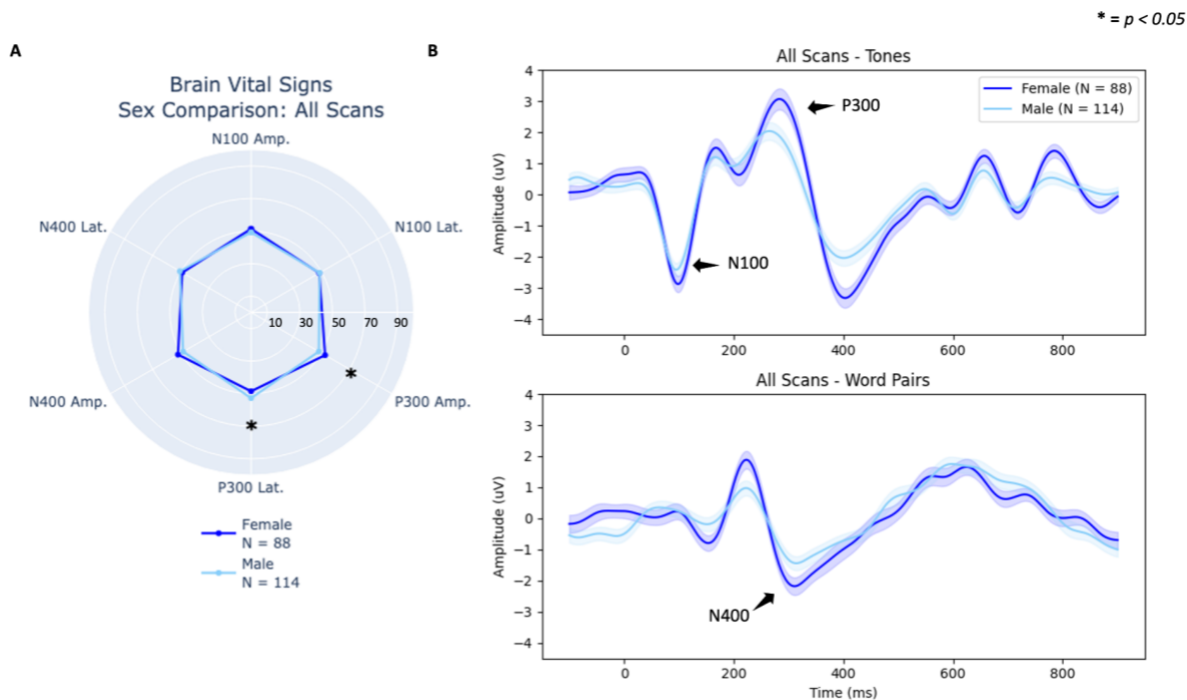

229  
230 **Figure 7:** Comparison of all female and male scans. **(A)** Radar plot showing individual-level brain vital  
231 sign differences across all six components. **(B)** Group-level waveforms from deviant tones (top) and  
232 incongruent word pairs (bottom) are plotted (standard error shading) confirming lower amplitudes in  
233 male athletes (highlighted with arrows).  
234

235 The current analyses examined high- versus low-contact, using equivalent exposure durations to  
236 prior studies. For additional analyses (N=202 scans), contact exposure levels were compared between  
237 low-contact exposure and both a single term and two or more terms of high-contact exposure. These  
238 results were closely consistent with both subconscious and sex effects above and are provided as  
239 Supplemental Data 4.  
240

## 241 Discussion

242  
243 The current findings replicated prior studies of subconscious changes in brain vital signs. The  
244 study used a large, prospective, repeated measures design to compare high- versus low-contact exposure  
245 across both female and male athletes. The findings supported the primary hypothesis that prior  
246 subconscious differences in the N400 and N100 would be detectable in a high- versus low- contact  
247 comparison (Figure 2), not only for male athletes but also in female athletes (Figure 4). Additional  
248 comparisons of female and male results showed significantly larger P300 and N400 responses for female  
249 athletes (Figure 6).  
250

251 *Subconcussive analyses*

## BRENTWOOD Research Study Manuscript

252 Subconcussive N400 changes replicate four previous studies on subconcussion (Breuer et al. 2023;  
253 Fickling et al. 2019; Fickling, Smith, et al. 2021; Fickling, Poel, et al. 2021). The N400 is commonly  
254 associated with high-order cognitive semantic processing (Kutas and Federmeier 2011; D’Arcy et al. 2004)  
255 and measures changes in semantic processing, suggesting the initial demonstration of cognitive changes  
256 due to contact (Connolly and D’Arcy 2000; D’Arcy et al. 2003; Gawryluk et al. 2010; Ghosh Hajra et al.  
257 2018). It is noteworthy that these replications have spanned across different sports and age ranges in  
258 male athletes. However, the specific N400 changes have varied with respect to latency delays and/or  
259 amplitude reductions, with the former directly measuring the rate of information processing and the latter  
260 related to synchronous pyramidal neural activation (Luck 2014). The two are interdependent factors  
261 reflecting a relative impairment in cognitive processing. While the initial results for female athletes  
262 showed comparable N400 latency delays, a specific pattern of change in N400 latency versus amplitude  
263 remains to be characterized.

264 Similarly, subconcussive changes in the N100 have been replicated across a number of prior  
265 studies. While the studies have reported only N100 amplitude changes, the direction of the effects has  
266 varied (i.e., decreases, increases, and correlated variability (Fickling et al. 2019; Fickling, Smith, et al. 2021;  
267 Fickling, Poel, et al. 2021). In prior linear regression analyses of the relationship between brain vital signs  
268 and helmet mounted accelerometers, inclusion of the N100 with the N400 provided additional  
269 explanatory variance (Fickling, Poel, et al. 2021). Consequently, N100 changes suggest that subconcussive  
270 impairments can span from lower-level sensory processing to higher level cognitive processing. As with  
271 the N400 above, the common preliminary results showing N100 changes in both female and male athletes  
272 do not rule out the possibility of specific differences. Indeed, examination of the female and male  
273 waveforms shows early sensory and attention differences in other ERP components (see below).

274 Of note, the current findings are the first to compare brain vital signs between high- and low-  
275 contact groups using a between-subjects design. To anchor to prior studies, a direct evaluation of the  
276 within-subjects pre- versus post- design has also demonstrated a significant delay in the N400 latency  
277 (Supplemental Data 2). The contribution of a control group is an important step, with the interpretation  
278 further underpinned by the nature of the closely matched comparison (i.e., related to questions about  
279 whether the effects are indeed attributable to subconcussive impact exposure). The student athletes in  
280 this study attended a private school with full time residence. Accordingly, all students follow a highly  
281 structured daily and weekly schedule, matched across programs, activities, diet, sleep, physical fitness,  
282 rest, and related factors.

283 Another novel aspect of the current study was the ability to begin exploring differences between  
284 a single term versus two or more terms of exposure to subconcussive impacts (Supplemental Data 4).  
285 While preliminary, the findings suggested that there may be a graded effect of exposure on the N400 peak  
286 latency (Supplemental Data 4). These results highlighted important questions related to tracking the  
287 extent of exposure with increased temporal resolution to characterize the changes over time. As reflected  
288 in the study design (Figure 1), a large cohort of these students were also re-evaluated after the summer  
289 break to determine whether this duration of rest resulted in a return to pre- baseline levels following post-  
290 subconcussive changes. Evaluation of these results are currently being analyzed as a follow-up study.  
291 While the emerging subconcussive findings are concerning, the demonstrated utility of using brain vital  
292 signs to objectively identify acute cognitive changes associated with repeated impact exposure has

## BRENTWOOD Research Study Manuscript

293 enabled clinical trials on potential interventions. A recent study on subconcussion focused on a  
294 prospective randomized placebo-controlled trial evaluating the effect of a dietary supplement effects  
295 created to reduce neuroinflammation and support energy production, on brain structure and function in  
296 Junior-A ice hockey players (Breuer et al. 2023). Breuer et al. (2023) randomized players into two groups:  
297 a group that took a supplement containing a combination of non-pharmacological ingredients shown to  
298 support brain health (Synaquell™ - Thorne Research Inc., NY, USA) daily over the season and a placebo  
299 control group who followed the same protocol without supplementation. Multivariate analyses showed  
300 significant neurocognitive pre- to post- season changes in only the control group, with significant negative  
301 impacts on the N100 and N400 along with reduced saccadic eye movement (King-Devick Test) and  
302 neurofilament light chain measures.

303

### 304 *Female and male comparison*

305 Robust P300 and N400 differences between female and male athletes were shown with and  
306 without subconcussive contact exposure as a factor. While the significant P300 and N400 differences  
307 demonstrated larger amplitudes for female athletes, examination of the overall waveforms showed this  
308 finding generally across all ERP responses. There are at least two potential factors related to interpretation  
309 of the difference between female and male athletes. One factor may relate to general attention difference  
310 during the approximately 6-minute test time, whereby female athletes showed increased sustained  
311 attention on average relative to male athletes. In this case, improved sustained attention to the task  
312 would result in a higher signal-to-noise ratio in the signal averaged ERPs and consequently higher response  
313 amplitudes. Alternatively, another factor may relate to a fundamental difference in ERP response size  
314 between female and male individuals. While these two factors are not mutually exclusive, the notable  
315 differences in baseline variance suggested sustained attention during the test time is likely a factor (Figure  
316 5). Differences in attention between female and male participants has been noted in prior literature, but  
317 these results are still mixed (Davidson, Cave, and Sellner 2000; Solianik, Brazaitis, and Skurvydas 2016;  
318 Riley et al. 2016).

319 As mentioned above, despite the subconcussive similarities between female and male athletes, it  
320 is too early to exclude differences, as an “absence of evidence is not evidence of absence.” For instance,  
321 examination of the ERP waveforms (Figure 4) shows noteworthy subconcussive differences in responses  
322 outside of the N100, P300, and N400. In particular, there appears to be a subconcussive reduction in the  
323 N200-P200 difference in female athletes, which is not present in male athletes. The N200-P200 is  
324 associated with early perceptual-attentional processing (Portella et al. 2012; D’Arcy, Connolly, and  
325 Crocker 2000; S. H. Patel and Azzam 2005), and further research should explore this in the context of sex-  
326 specific changes in subconcussion and head-impact exposure. With respect to this, the clinical importance  
327 of even small attentional impairments can consequently have a larger impact on high-level processing for  
328 individuals in attention demanding professions. For example, we identified early on in clinical concussion  
329 evaluation that these changes can have a compounding effect on high demand jobs such as air traffic  
330 controllers relative to less attentionally-demanding positions (Mateer and D’Arcy 2000). A comparable  
331 impact may be a consideration for enhanced sustained attention processing in female athletes. Given  
332 recent advances in understanding functional neuroanatomical differences (Andrushko et al. 2023), further  
333 studies needed to better characterize female- versus male- specific subconcussive profiles.

## BRENTWOOD Research Study Manuscript

334

### 335 *Limitations and Future Directions*

336 The current study included data across a large sample made up of smaller subsets across different  
337 sports, with differing contact levels. While this was beneficial to create a large sample size for this study,  
338 larger subsets of groups pertaining to each specific sport would help elucidate sport-specific differences.  
339 Similarly, history of high-contact sport participation and concussion are important variables that may  
340 affect the current state of participants. Nonetheless, the current study is the first in a continuing  
341 investigation that will subsequently focus on specific sports and recovery times following subconcussive  
342 impairment in contact sport. Future studies will expand to focus on recovery effects and differences  
343 following summer break. Also, the current study combined subjects in grades 10-12 in a highly structured  
344 school environment; however, previous work has shown differing neurological developmental rates  
345 between female and male adolescents (Paus 2010; Kaczurkin, Raznahan, and Satterthwaite 2019; Gur  
346 and Gur 2016), which may have been a factor for female and male-specific profiles. Future work will  
347 include larger age subset sizes and longitudinal analyses, as well as controlling for age as a co-variate in  
348 future models, to have a better understanding of developmental differences between female and male  
349 individuals. Finally, the current study did not track important biological factors that differ between female  
350 and male athletes. These factors include but are not limited to menstrual cycle phase at time of exposure  
351 or in the case of multiple exposures, when the majority of exposures occurred (menstrual phase has been  
352 a predictor of mild TBI outcome (Wunderle et al. 2014) and progesterone shows neuroprotective as a TBI  
353 treatment (Wright et al. 2007)); body fat percentages given recent understanding of fat being a major  
354 endocrine organ (Musi and Guardado-Mendoza 2014); and diet given the understanding of diet impact  
355 on inflammation and brain function (P. R. Patel et al. 2023; Markovic et al. 2021). With clear  
356 neurophysiological differences identified between females and males, future work must include expanded  
357 characterization of these key biological factors to understand change that may affect results at the time  
358 of evaluation. Lastly, to better understand the resulting effect of these subconcussive neurophysiological  
359 changes and differences, additional study variables should include heart rate variability data to  
360 understand clinical and sub-clinical autonomic dysfunction and time to recovery, as well as changes in  
361 sleep and endocrine levels due to RHI, as TBI may lead to endocrine changes, specifically in developing  
362 adolescents (Richmond and Rogol 2014).

363

### 364 **Conclusion**

365 With increasing attention on subconcussive impairments and potential interventions to limit  
366 future risks (e.g., long-term neuropsychiatric impairment, chronic traumatic encephalopathy – CTE), the  
367 current findings provide a large sample demonstration of subconcussive changes between closely  
368 matched high- versus low-contact student athletes that replicate previous investigations. The findings  
369 provide strong support for continued focus on the role of subconcussive injuries in sport-related brain  
370 health research. Importantly, as this field of study has historically focused on male athletes, inclusion of  
371 female athletes in the current findings represents a critical milestone towards understanding specific  
372 neurophysiological differences before and after exposure to subconcussive impacts. Initial results strongly  
373 support continued investigations that span beyond male athletes in helmeted contact sports.

374

BRENTWOOD Research Study  
Manuscript

375 **Methods**

376  
377 A total of 89 high school students were scanned 231 times over the year (34 females and 55  
378 males). In total, 8 scans were removed due to attrition, 12 scans had a data collection error, failing to  
379 produce scan data, 5 due to dropping all epochs for a condition (i.e. deviant tones), and 4 due to excess  
380 noise (N=202 scans). For analysis and results we ended with N=81, n=202 (33 females and 48 males). The  
381 current study focused on a scan-based between contact groups analysis, instead of a pre-post subject  
382 based within-subjects analysis. I.e. results from a subject scan after a season of low contact sport would  
383 be characterized as a low contact data point (not a benchmark or pre data point), while if that same  
384 subject had a separate scan later in the school year after 2 terms of high contact, that scan would be  
385 characterized as a high contact data point. This was done to maximize the total data point number for  
386 analyses and provide more equal weighting across groups, as opposed to a repeated measure subject-  
387 based analysis including only subjects that had not had any contact immediately prior to the study.

388 All healthy participants were in grades 10 through 12 (age range: 15-17), fluent in English, no  
389 history of concussion in the past 6-months, no self-reported problems with brain function, and had no  
390 hearing problems. All participants were recruited from Brentwood College School athletic programs,  
391 which involve either high-contact (e.g., rugby, ice-hockey, soccer, field hockey, jujitsu, and basketball) or  
392 no-contact/low-contact sports (e.g., rowing, tennis, and climbing) over three distinct three-month terms  
393 in the school year (Fig. 1). As described above, Brentwood is a private boarding school in which all students  
394 follow a structured daily schedule and a similar diet, exercise, and sleep schedule throughout the  
395 academic year. Accordingly, participants were closely matched across a wide number of typical lifestyle  
396 factors. The study had Advarra institutional research ethics board approval and all participants along with  
397 their guardians provided informed consent.

398  
399 **Data Collection**

400 The brain vital sign framework (Ghosh Hajra et al. 2016) was employed with the NeuroCatch®  
401 Platform (Version 1.1), which uses EEG to rapidly extract the N100, P300, and N400 ERPs. All three ERPs  
402 were stimulated using a compressed and standardized auditory stimulus sequence (approximately 6  
403 minutes) consisting of sets of tones and spoken word pairs. The brain vital signs framework utilizes an  
404 oddball paradigm, involving frequent standard tones with infrequent oddball tones, which elicit the N100  
405 and P300 components. The tone stimuli precede word pairs, which are either matched or mismatched  
406 semantically-related word-pair primes (e.g., match: bread-butter; mismatch: bread-window) to elicit the  
407 N400 component. Participants passively listened to the stimuli and decided if the word pairs matched or  
408 mismatched.

409 Participants were fitted with an elasticized cloth cap containing an 8-channel EEG amplifier with  
410 standardized electrode locations (Fz, Cz, & Pz). Three additional electrodes were placed on the  
411 participant's forehead to record the ground (GND) and electrooculogram (vEOG, hEOG) signals. A  
412 reference electrode was clipped to the participant's right earlobe. Standard EEG skin preparation (70%  
413 isopropyl alcohol wipes) and conductive gel products (SignaGel) were used to ensure appropriate contact  
414 for all EEG sensors. Distractions were mitigated by performing the scans in a quiet and closed classroom.

## BRENTWOOD Research Study Manuscript

415 The same environment was used for all scans. Participants were asked to listen attentively to the stimuli,  
416 but no active response was required. To reduce motor and ocular artifacts, participants were instructed  
417 to sit motionlessly, and maintain visual fixation on a cross positioned at eye level 2 m away.

418  
419

## 420 Data Processing

421 The NeuroCatch® Platform was calibrated for any trigger latency delays. The most common delay  
422 was identified and applied to shift all trigger data. EEG data were processed using a fourth order  
423 Butterworth filter (0.5-10 Hz) and a Notch filter (60 Hz). Adaptive filtering using electrooculogram  
424 channels was used to correct for ocular artifacts. EEG was epoched based on stimulus events using an  
425 epoch from -100ms pre-stimulus to 1000ms post-stimulus. All epochs were linearly detrended and any  
426 epochs with noise exceeding  $\pm 75\mu\text{V}$  were rejected. N100, P300, and N400 peaks were calculated using  
427 the maximal peak within a standard temporal window and manually verified. Amplitude and latency  
428 metrics from these peaks were then linearly transformed into standardized scores on a scale from 0 to  
429 100, derived from entire group means (Fickling et al. 2019). All preprocessing was completed in Python  
430 using the Scipy and MNE libraries.

431  
432

## 433 Statistical Analysis

434 All individual-level statistical analyses of peak amplitude and latencies were performed using  
435 SPSS (Version 29.0.0, IBM, NY, USA). In the current study, individual-level can be defined as amplitudes  
436 and latencies from each individual scan data, not derived from the group-level average waveforms. To  
437 assess differences in brain vital signs between contact groups and sex, brain vital sign scores were  
438 compared using a multivariate analysis of variance (MANOVA) (**Between:** Group: low-contact and high-  
439 contact; Sex: Female and Male) on N100, P300, and N400 amplitudes and latencies for only scans  
440 characterized as low-contact or high-contact for two or more terms. To further assess differences in  
441 brain vital signs between sex in a larger number of scans, brain vital sign scores were compared using a  
442 multivariate analysis of variance (MANOVA) (**Between:** Sex: Female and Male) on N100, P300, and N400  
443 amplitudes and latencies for all 202 scans collected. All univariate results are adjusted for multiple  
444 comparisons using Bonferroni adjustment. All statistics were also rerun only with subjects with less than  
445 50% of epochs dropped (12 of 202 scans dropped) due to the  $75\mu\text{V}$  thresholding measures mentioned  
446 above. To keep our participant number large and because the analysis resulted in very similar outcomes,  
447 the current manuscript reports the statistics from the full group data, including subjects with more than  
448 50% of epochs dropped.

449

450

## 451 Acknowledgements

452

## BRENTWOOD Research Study Manuscript

453           The authors would like to acknowledge the important leadership of Dr. Aynsley Smith (Mayo  
454 Clinic, retired), whose passionate leadership for research advances in sports-related concussion and  
455 ever-lasting priority to translate research advances to young females and males served as an important  
456 inspiration for this study. The authors would also like to acknowledge the technical assistance by Joshua  
457 Ighalo and the assistance in data collection by Laila Reed.

458

## 459 Funding

460           This work has been supported in part by funding from the Natural Sciences and Engineering  
461 Research Council of Canada (Discovery Grant, PI R.C.N. D'Arcy; CGS M, E.D. Kirby).

462

## 463 Competing interests

464           Some of the authors (EDK, TY, NYB, SDF, RCND) have financial and/or business interests in  
465 HealthTech Connex Inc., which may be affected by the research reported in this paper. Over the past 36  
466 months, DWD reports the following competing interests: Consulting: Amgen, Atria, CapiThera Ltd.,  
467 Cerecin, Ceruvia Lifesciences LLC, CoolTech, Ctrl M, Allergan, AbbVie, Biohaven, GlaxoSmithKline,  
468 Lundbeck, Eli Lilly, Novartis, Impel, Satsuma, Theranica, WL Gore, Genentech, Nocira, Perfood, Praxis,  
469 AYYA Biosciences, Revance, Pfizer. Honoraria: American Academy of Neurology, Headache Cooperative  
470 of the Pacific, Canadian Headache Society, MF Med Ed Research, Biopharm Communications, CEA Group  
471 Holding Company (Clinical Education Alliance LLC), Teva (speaking), Amgen (speaking), Eli Lilly  
472 (speaking), Lundbeck (speaking), Pfizer (speaking), Vector Psychometric Group, Clinical Care Solutions,  
473 CME Outfitters, Curry Rockefeller Group, DeepBench, Global Access Meetings, KLJ Associates, Academy  
474 for Continued Healthcare Learning, Majallin LLC, Medlogix Communications, Medica Communications  
475 LLC, MJH Lifesciences, Miller Medical Communications, WebMD Health/Medscape, Wolters Kluwer,  
476 Oxford University Press, Cambridge University Press. Non-profit board membership: American Brain  
477 Foundation, American Migraine Foundation, ONE Neurology, Precon Health Foundation, International  
478 Headache Society Global Patient Advocacy Coalition, Atria Health Collaborative, Arizona Brain Injury  
479 Alliance, Domestic Violence HOPE Foundation/Panfila. Research support: Department of Defense,  
480 National Institutes of Health, Henry Jackson Foundation, Sperling Foundation, American Migraine  
481 Foundation, Henry Jackson Foundation, Patient Centered Outcomes Research Institute (PCORI). Stock  
482 options/shareholder/patents/board of directors: Aural analytics (options), Axon Therapeutics, ExSano  
483 (options), Palion (options), Man and Science, Healint (options), Theranica (options), Second  
484 Opinion/Mobile Health (options), Epien (options/board), Nocira (options), Matterhorn (shares/board),  
485 Ontologics (shares/board), King-Devick Technologies (options/board), Precon Health (options/board),  
486 AYYA Biosciences (options), Axon Therapeutics (options/board), Cephalgia Group (options/board), Atria  
487 Health (options/employee). Patent 17189376.1-1466:vTitle: Onabotulinum Toxin Dosage Regimen for  
488 Chronic Migraine Prophylaxis (Non-royalty bearing). Patent application submitted: Synaquell® (Precon  
489 Health).

490

## 491 Author Contributions

492



BRENTWOOD Research Study  
Manuscript

493 RCND assisted with project study design, manuscript drafting, and acted as lab PI. DM  
494 contributed with data collection and project study design. DH contributed with data collection, data  
495 processing, and manuscript editing. ZL contributed with data collection and manuscript editing. JW  
496 contributed with data collection and manuscript editing. AH contributed with data collection, statistical  
497 analysis, and manuscript editing. EDK contributed with data processing, statistical analysis, and  
498 manuscript drafting. TY, NYB, SDF, TAM, DD, CA, and KSS contributed with manuscript editing.

499

## 500 References

501

- 502 Andrushko, Justin W., Shie Rinat, Eric D. Kirby, Julia Dahlby, Chelsea Ekstrand, and Lara A.  
503 Boyd. 2023. "Females Exhibit Smaller Volumes of Brain Activation and Lower Inter-  
504 Subject Variability during Motor Tasks." *Scientific Reports* 13 (1): 17698.  
505 <https://doi.org/10.1038/s41598-023-44871-4>.
- 506 Breuer, Logan T., Shaun D. Fickling, David A. Krause, Ryan C. N. D'Arcy, Tory O. Frizzell,  
507 Tania Gendron, and Michael J. Stuart. 2023. "The Effects of a Dietary Supplement on  
508 Brain Function and Structure in Junior A Ice Hockey Players: A Prospective Randomized  
509 Trial." medRxiv. <https://doi.org/10.1101/2023.04.03.23288079>.
- 510 Connolly, John F, and Ryan C. N D'Arcy. 2000. "Innovations in Neuropsychological Assessment  
511 Using Event-Related Brain Potentials." *International Journal of Psychophysiology* 37 (1):  
512 31–47. [https://doi.org/10.1016/S0167-8760\(00\)00093-3](https://doi.org/10.1016/S0167-8760(00)00093-3).
- 513 D'Arcy, Ryan C. N, John F Connolly, and Susan F Crocker. 2000. "Latency Shifts in the N2b  
514 Component Track Phonological Deviations in Spoken Words." *Clinical Neurophysiology*  
515 111 (1): 40–44. [https://doi.org/10.1016/S1388-2457\(99\)00210-2](https://doi.org/10.1016/S1388-2457(99)00210-2).
- 516 D'Arcy, Ryan C. N, Yannick Marchand, Gail A Eskes, Edmund R Harrison, Stephen J Phillips,  
517 Alma Major, and John F Connolly. 2003. "Electrophysiological Assessment of Language  
518 Function Following Stroke." *Clinical Neurophysiology* 114 (4): 662–72.  
519 [https://doi.org/10.1016/S1388-2457\(03\)00007-5](https://doi.org/10.1016/S1388-2457(03)00007-5).
- 520 D'Arcy, Ryan C.N., John F. Connolly, Elisabet Service, Colin S. Hawco, and Michael E.  
521 Houlihan. 2004. "Separating Phonological and Semantic Processing in Auditory  
522 Sentence Processing: A High-Resolution Event-Related Brain Potential Study." *Human*  
523 *Brain Mapping*. <https://doi.org/10.1002/hbm.20008>.
- 524 Davidson, Heather, Kyle R Cave, and Daniela Sellner. 2000. "Differences in Visual Attention  
525 and Task Interference between Males and Females Reflect Differences in Brain  
526 Laterality." *Neuropsychologia* 38 (4): 508–19. [https://doi.org/10.1016/S0028-3932\(99\)00084-6](https://doi.org/10.1016/S0028-3932(99)00084-6).
- 527
- 528 Davis, P. A. 1939. "Effects of Acoustic Stimuli on the Waking Human Brain." *Journal of*  
529 *Neurophysiology* 2 (6): 494–99. <https://doi.org/10.1152/jn.1939.2.6.494>.
- 530 Dioso, Emma, John Cerillo, Mohammed Azab, Devon Foster, Isaac Smith, Owen Leary, Michael  
531 Goutnik, and Brandon Lucke-Wold. 2022. "Subconcussion, Concussion, and Cognitive  
532 Decline: The Impact of Sports Related Collisions." *Journal of Medical Research and*  
533 *Surgery* 3 (4): 54–63. <https://doi.org/10.52916/jmrs224081>.
- 534 Fickling, Shaun D, Daniel N Poel, Jason C Dorman, Ryan C N D'Arcy, and Thayne A Munce.  
535 2021. "Subconcussive Changes in Youth Football Players: Objective Evidence Using  
536 Brain Vital Signs and Instrumented Accelerometers." *Brain Communications* 4 (2):  
537 fcab286. <https://doi.org/10.1093/braincomms/fcab286>.
- 538 Fickling, Shaun D., Aynsley M. Smith, Gabriela Pawlowski, Sujoy Ghosh Hajra, Careesa C. Liu,  
539 Kyle Farrell, Janelle Jorgensen, Xiaowei Song, Michael J. Stuart, and Ryan C.N. D'Arcy.

BRENTWOOD Research Study

Manuscript

- 540 2019. "Brain Vital Signs Detect Concussion-Related Neurophysiological Impairments in  
541 Ice Hockey." *Brain* 142 (2): 255–62. <https://doi.org/10.1093/brain/awy317>.
- 542 Fickling, Shaun D, Aynsley M Smith, Michael J Stuart, David W Dodick, Kyle Farrell, Sara C  
543 Pender, and Ryan C N D'Arcy. 2021. "Subconcussive Brain Vital Signs Changes Predict  
544 Head-Impact Exposure in Ice Hockey Players." *Brain Communications* 3 (2): fcab019.  
545 <https://doi.org/10.1093/braincomms/fcab019>.
- 546 Gawryluk, Jodie R., Ryan C.N. D'Arcy, John F. Connolly, and Donald F. Weaver. 2010.  
547 "Improving the Clinical Assessment of Consciousness with Advances in  
548 Electrophysiological and Neuroimaging Techniques." *BMC Neurology*.  
549 <https://doi.org/10.1186/1471-2377-10-11>.
- 550 Ghosh Hajra, Sujoy, Careesa C. Liu, Xiaowei Song, Shaun D. Fickling, Teresa P. L. Cheung,  
551 and Ryan C. N. D'Arcy. 2018. "Multimodal Characterization of the Semantic N400  
552 Response within a Rapid Evaluation Brain Vital Sign Framework." *Journal of*  
553 *Translational Medicine* 16 (June): 151. <https://doi.org/10.1186/s12967-018-1527-2>.
- 554 Ghosh Hajra, Sujoy, Careesa C. Liu, Xiaowei Song, Shaun Fickling, Luke E. Liu, Gabriela  
555 Pawlowski, Janelle K. Jorgensen, et al. 2016. "Developing Brain Vital Signs: Initial  
556 Framework for Monitoring Brain Function Changes Over Time." *Frontiers in*  
557 *Neuroscience* 10. <https://www.frontiersin.org/article/10.3389/fnins.2016.00211>.
- 558 Gur, Raquel E., and Ruben C. Gur. 2016. "Sex Differences in Brain and Behavior in  
559 Adolescence: Findings from the Philadelphia Neurodevelopmental Cohort."  
560 *Neuroscience & Biobehavioral Reviews*, The Adolescent Brain, 70 (November): 159–70.  
561 <https://doi.org/10.1016/j.neubiorev.2016.07.035>.
- 562 Guskiewicz, Kevin M., Stephen W. Marshall, Julian Bailes, Michael McCrea, Robert C. Cantu,  
563 Christopher Randolph, and Barry D. Jordan. 2005. "Association between Recurrent  
564 Concussion and Late-Life Cognitive Impairment in Retired Professional Football  
565 Players." *Neurosurgery* 57 (4): 719.  
566 <https://doi.org/10.1227/01.NEU.0000175725.75780.DD>.
- 567 Hirad, Adnan A., Jeffrey J. Bazarian, Kian Merchant-Borna, Frank E. Garcea, Sarah  
568 Heilbronner, David Paul, Eric B. Hintz, et al. 2019. "A Common Neural Signature of Brain  
569 Injury in Concussion and Subconcussion." *Science Advances* 5 (8): eaau3460.  
570 <https://doi.org/10.1126/sciadv.aau3460>.
- 571 Kaczurkin, Antonia N., Armin Raznahan, and Theodore D. Satterthwaite. 2019. "Sex  
572 Differences in the Developing Brain: Insights from Multimodal Neuroimaging."  
573 *Neuropsychopharmacology* 44 (1): 71–85. <https://doi.org/10.1038/s41386-018-0111-z>.
- 574 Kutas, Marta, and Kara D. Federmeier. 2011. "Thirty Years and Counting: Finding Meaning in  
575 the N400 Component of the Event-Related Brain Potential (ERP)." *Annual Review of*  
576 *Psychology*. <https://doi.org/10.1146/annurev.psych.093008.131123>.
- 577 Luck, Steven J. 2014. *An Introduction to the Event-Related Potential Technique, Second*  
578 *Edition*. MIT Press.
- 579 Mainwaring, Lynda, Kaleigh M. Ferdinand Pennock, Sandhya Mylabathula, and Benjamin Z.  
580 Alavie. 2018. "Subconcussive Head Impacts in Sport: A Systematic Review of the  
581 Evidence." *International Journal of Psychophysiology*, Long-term outcomes of sport-  
582 related brain injuries: A psychophysiological perspective, 132 (October): 39–54.  
583 <https://doi.org/10.1016/j.ijpsycho.2018.01.007>.
- 584 Markovic, Shaun J., Melinda Fitzgerald, Jeremiah J. Peiffer, Brendan R. Scott, Stephanie R.  
585 Rainey-Smith, Hamid R. Sohrabi, and Belinda M. Brown. 2021. "The Impact of Exercise,  
586 Sleep, and Diet on Neurocognitive Recovery from Mild Traumatic Brain Injury in Older  
587 Adults: A Narrative Review." *Ageing Research Reviews* 68 (July): 101322.  
588 <https://doi.org/10.1016/j.arr.2021.101322>.

BRENTWOOD Research Study

Manuscript

- 589 Mateer, Catherine A., and Ryan C. N. D'Arcy. 2000. "Current Concepts in Assessment and  
590 Management." In *Neuropsychological Management of Mild Traumatic Brain Injury*, edited  
591 by Sarah A. Raskin and Catherine A. Mateer. New York, NY, USA: Oxford University  
592 Press.
- 593 McKee, Ann C., Robert C. Cantu, Christopher J. Nowinski, E. Tessa Hedley-Whyte, Brandon E.  
594 Gavett, Andrew E. Budson, Veronica E. Santini, Hyo-Soon Lee, Caroline A. Kubilus, and  
595 Robert A. Stern. 2009. "Chronic Traumatic Encephalopathy in Athletes: Progressive  
596 Tauopathy After Repetitive Head Injury." *Journal of Neuropathology & Experimental*  
597 *Neurology* 68 (7): 709–35. <https://doi.org/10.1097/NEN.0b013e3181a9d503>.
- 598 Musi, Nicolas, and Rodolfo Guardado-Mendoza. 2014. "Chapter 14 - Adipose Tissue as an  
599 Endocrine Organ." In *Cellular Endocrinology in Health and Disease*, edited by Alfredo  
600 Ulloa-Aguirre and P. Michael Conn, 229–37. Boston: Academic Press.  
601 <https://doi.org/10.1016/B978-0-12-408134-5.00014-7>.
- 602 Nowak, Madeleine K., Zachary W. Bevilacqua, Keisuke Ejima, Megan E. Huibregtse, Zhongxue  
603 Chen, Timothy D. Mickleborough, Sharlene D. Newman, and Keisuke Kawata. 2020.  
604 "Neuro-Ophthalmologic Response to Repetitive Subconcussive Head Impacts: A  
605 Randomized Clinical Trial." *JAMA Ophthalmology* 138 (4): 350–57.  
606 <https://doi.org/10.1001/jamaophthalmol.2019.6128>.
- 607 Patel, Palak R., Patrick Armistead-Jehle, Nicholas R. Eltman, Kelly M. Heath, David X. Cifu, and  
608 Randel L. Swanson. 2023. "Brain Injury: How Dietary Patterns Impact Long-Term  
609 Outcomes." *Current Physical Medicine and Rehabilitation Reports* 11 (3): 367–76.  
610 <https://doi.org/10.1007/s40141-023-00413-7>.
- 611 Patel, Salil H., and Pierre N. Azzam. 2005. "Characterization of N200 and P300: Selected  
612 Studies of the Event-Related Potential." *International Journal of Medical Sciences* 2 (4):  
613 147–54.
- 614 Paus, Tomáš. 2010. "Chapter 2 - Sex Differences in the Human Brain: A Developmental  
615 Perspective." In *Progress in Brain Research*, edited by Ivanka Savic, 186:13–28. Sex  
616 Differences in the Human Brain, Their Underpinnings and Implications. Elsevier.  
617 <https://doi.org/10.1016/B978-0-444-53630-3.00002-6>.
- 618 Portella, Claudio, Sergio Machado, Oscar Arias-Carrión, Alexander T. Sack, Julio Guilherme  
619 Silva, Marco Orsini, Marco Antonio Araujo Leite, et al. 2012. "Relationship Between  
620 Early and Late Stages of Information Processing: An Event-Related Potential Study."  
621 *Neurology International* 4 (3): e16. <https://doi.org/10.4081/ni.2012.e16>.
- 622 Richmond, Erick, and Alan D. Rogol. 2014. "Traumatic Brain Injury: Endocrine Consequences in  
623 Children and Adults." *Endocrine* 45 (1): 3–8. <https://doi.org/10.1007/s12020-013-0049-1>.
- 624 Riley, Elizabeth, Hidefusa Okabe, Laura Germine, Jeremy Wilmer, Michael Esterman, and  
625 Joseph DeGutis. 2016. "Gender Differences in Sustained Attentional Control Relate to  
626 Gender Inequality across Countries." *PLoS ONE* 11 (11): e0165100.  
627 <https://doi.org/10.1371/journal.pone.0165100>.
- 628 Saghafi, Behrouz, Gowtham Murugesan, Elizabeth Davenport, Ben Wagner, Jillian Urban,  
629 Mireille Kelley, Derek Jones, et al. 2018. "Quantifying the Association between White  
630 Matter Integrity Changes and Subconcussive Head Impact Exposure from a Single  
631 Season of Youth and High School Football Using 3D Convolutional Neural Networks."  
632 *Proceedings of SPIE--the International Society for Optical Engineering* 10575  
633 (February): 105750E. <https://doi.org/10.1117/12.2293023>.
- 634 Smith, Aynsley M., Patrick A. Alford, Mark Aubry, Brian Benson, Amanda Black, Alison Brooks,  
635 Charles Burke, et al. 2019. "Proceedings from the Ice Hockey Summit III: Action on  
636 Concussion." *Current Sports Medicine Reports* 18 (1): 23.  
637 <https://doi.org/10.1249/JSR.0000000000000557>.

BRENTWOOD Research Study

Manuscript

- 638 Snedaker, Katherine Price, Jennifer P. Lundine, Angela H. Ciccia, Mohammad Nadir Haider,  
639 and Katy H. O'Brien. 2022. "Gaps in Concussion Management across School-Aged  
640 Children." *Brain Injury* 36 (6): 714–21. <https://doi.org/10.1080/02699052.2022.2034954>.  
641 Solianik, Rima, Marius Brazaitis, and Albertas Skurvydas. 2016. "Sex-Related Differences in  
642 Attention and Memory." *Medicina* 52 (6): 372–77.  
643 <https://doi.org/10.1016/j.medici.2016.11.007>.  
644 Sutton, Samuel, Patricia Tueting, Joseph Zubin, and E. R. John. 1967. "Information Delivery  
645 and the Sensory Evoked Potential." *Science* 155 (3768): 1436–39.  
646 <https://doi.org/10.1126/science.155.3768.1436>.  
647 Valera, Eve M., Annie-Lori C. Joseph, Katherine Snedaker, Matthew J. Breiding, Courtney L.  
648 Robertson, Angela Colantonio, Harvey Levin, et al. 2021. "Understanding Traumatic  
649 Brain Injury in Females: A State-of-the-Art Summary and Future Directions." *The Journal*  
650 *of Head Trauma Rehabilitation* 36 (1): E1–17.  
651 <https://doi.org/10.1097/HTR.0000000000000652>.  
652 Veksler, Ronel, Udi Vazana, Yonatan Serlin, Ofer Prager, Jonathan Ofer, Nofar Shemen,  
653 Andrew M Fisher, et al. 2020. "Slow Blood-to-Brain Transport Underlies Enduring Barrier  
654 Dysfunction in American Football Players." *Brain* 143 (6): 1826–42.  
655 <https://doi.org/10.1093/brain/awaa140>.  
656 Wright, David W., Arthur L. Kellermann, Vicki S. Hertzberg, Pamela L. Clark, Michael Frankel,  
657 Felicia C. Goldstein, Jeffrey P. Salomone, et al. 2007. "ProTECT: A Randomized Clinical  
658 Trial of Progesterone for Acute Traumatic Brain Injury." *Annals of Emergency Medicine*  
659 49 (4): 391-402.e2. <https://doi.org/10.1016/j.annemergmed.2006.07.932>.  
660 Wunderle, Kathryn, Kathleen M. Hoeger, Erin Wasserman, and Jeffrey J. Bazarian. 2014.  
661 "Menstrual Phase as Predictor of Outcome After Mild Traumatic Brain Injury in Women."  
662 *The Journal of Head Trauma Rehabilitation* 29 (5): E1.  
663 <https://doi.org/10.1097/HTR.0000000000000006>.  
664
