1  
2  
3  
4  
5  
6  
7  
8  
9  
10  
11  
12  
13  
14  
15  
16  
17  
18  
19  
20  
21  
22  
23  
24  
25  
26  
27  
28  
29  
30  
31  
32  
33  
34

A brain vital sign study of subconcussion in female and male high school student athletes

Ryan C.N. D’Arcy<sup>1,2,3\*</sup>, David McCarthy<sup>4</sup>, Derek Harrison<sup>4</sup>, Zander Levenberg<sup>4</sup>, Julian Wan<sup>4</sup>, Aidan Hepburn<sup>4</sup>, Eric D. Kirby<sup>1,5</sup>, Tanja Yardley<sup>6</sup>, Nikita Yamada-Bagg<sup>2</sup>, Shaun D. Fickling<sup>1,2</sup>, Thayne A. Munce<sup>7</sup>, David W. Dodick<sup>8,9</sup>, Christopher Ahmad<sup>10,11</sup>, & Ken Shubin Stein<sup>9,12</sup>

- 1) BrainNET, Health and Technology District, Surrey, BC, Canada;
- 2) Centre for Neurology Studies, HealthTech Connex, Surrey, BC, Canada;
- 3) Faculty of Engineering Science, Simon Fraser University, Burnaby, BC, Canada;
- 4) Brentwood College School, BRAIN team, Mill Bay, BC, Canada;
- 5) Faculty of Individualized Interdisciplinary Studies, Simon Fraser University, Burnaby, BC, Canada;
- 6) Surrey Neuroplasticity Clinic, HealthTech Connex, Surrey, BC, Canada;
- 7) Environmental Influences on Health & Disease Group, Sanford Research, Sioux Falls, SD, USA;
- 8) Mayo Clinic College of Medicine, Rochester, MN, USA;
- 9) Atria Academy of Science and Medicine, New York City, NY, USA;
- 10) New York Presbyterian Hospital, New York City, NY, USA;
- 11) Columbia University Irving Medical Center, New York City, NY, USA;
- 12) Hospital for Special Surgery, New York City, NY, USA.

\*Corresponding author: Ryan C.N. D’Arcy, PhD, PIEng, Centre for Neurology Studies, HealthTech Connex, Surrey, BC Canada [ryan@healthtechconnex.com](mailto:ryan@healthtechconnex.com)

BRENTWOOD Research Study  
Manuscript

## 35 **Abstract**

36 Emerging evidence from neurophysiological brain vital sign studies show repeatable sensitivity  
37 to cumulative subconcussive impairments over a season of contact sports. The current study addressed  
38 the need for a large prospective study comparing a low-contact control group to high-contact group.  
39 Importantly, the study also expanded the scope of neurophysiological changes related to repetitive head  
40 impacts to include female athletes in addition to male athletes. In total, 89 high school student athletes  
41 underwent 231 brain vital sign scans over a full calendar year. The results replicated prior subconcussive  
42 cognitive impairments (N400 delays) and sensory impairments (N100 amplitude reductions) in male  
43 athletes and demonstrated similar subconcussive impairments for the first time in female athletes.  
44 While there was no significant subconcussive difference between female and male athletes, female  
45 athletes show overall larger responses in general. The findings demonstrated that subconcussive  
46 impairments are detectable in a controlled experimental comparison for both female and male high  
47 school athletes. The study highlights the opportunity to monitor subconcussive changes in cognitive  
48 processing for both female and male athletes to help advance prevention, mitigation and management  
49 efforts aimed at reducing athletes' risk of potential long-term negative health outcomes related to  
50 cumulative exposure to repetitive head impacts.

51

## 52 **Introduction**

53

## 54 **Background**

55 Head impact exposure from participating in contact or collision sports is commonly associated  
56 with concussion; however, subconcussion is a growing concern for athletes as well as a developing  
57 research area in parallel (Smith et al., 2018; 2019). Subconcussion has been increasingly implicated with  
58 potential short-term consequences on the developing brains and longer-term concerns related to chronic  
59 traumatic encephalopathy (McKee et al. 2009; Guskiewicz et al. 2005; Dioso et al. 2022). Concussion  
60 research has also historically been primarily focused on males (Valera et al. 2021; Snedaker et al. 2022).  
61 Therefore, emerging subconcussive research must be inclusive of both female and male athletes. This is a  
62 timely priority as new intervention options begin to emerge from the clinical trials literature (Breuer et al.  
63 2023).

64 Operationally defined, a subconcussive impact is a mechanical force transmitted to the brain  
65 below the threshold for a diagnosis of an acute concussive injury. The effects of these repetitive head  
66 impacts (RHI) may neither be detectable to players nor to observers; however, it has been shown that RHI  
67 over time can result in both microstructural alterations and functional brain impairment (Mainwaring et  
68 al. 2018). The extent of impairment is highly correlated with the frequency of exposure to these impacts  
69 (Fickling, Smith, et al. 2021; Fickling, Poel, et al. 2021; Hirad et al. 2019; Saghafi et al. 2018; Fickling et al.  
70 2019).

71 Recent research has increasingly focused on the role of cumulative RHI exposure rather than a  
72 concussion as a singular, acute traumatic event. Evidence suggests that even a single practice session  
73 involving head contact, such as heading a ball in soccer, can result in impairment (Nowak et al. 2020).  
74 Magnetic resonance imaging (MRI) studies have demonstrated that players exposed to RHI over the

## BRENTWOOD Research Study Manuscript

75 course of a season of sport show significant structural abnormalities compared to controls over the same  
76 time period (Hirad et al. 2019; Saghafi et al. 2018; Veksler et al. 2020). Both Hirad et al. (2019) and Saghafi  
77 et al. (2018) used diffusion-tensor imaging, an MRI-derived technique, to show abnormalities in the white  
78 matter of a group of football athletes were related to different measures of head impact exposure.  
79 Interestingly, while detecting differences in permeability and white matter microstructure in the brains of  
80 contact sport athletes, Veksler et al. (2020) did not find any statistical differences in blood-brain barrier  
81 permeability between non-contact athletes and non-athlete healthy controls, leading the authors to  
82 merge the groups into a single control group.

83 A major challenge for current medical imaging approaches, including MRI, relates to the need for  
84 accessible, objective, and sensitive measures of subconcussive impacts at points-of-care (PoC). Portable  
85 electroencephalography (EEG) provides the evaluation of individual neurophysiological event-related  
86 potentials (ERPs). These have recently been translated into a brain vital signs framework, facilitating  
87 access to sensitive measures for various PoC applications (Ghosh Hajra et al. 2016). Three well-established  
88 ERP responses are extracted within the brain vital signs framework: 1) the N100 for auditory sensation  
89 (Davis 1939); 2) the P300 for basic attention (Sutton et al. 1967); and 3) the N400 for cognitive processing  
90 (Kutas and Federmeier 2011). Brain vital signs have been successfully implemented in the evaluation of  
91 both concussion and subconcussion (Fickling et al. 2019; Fickling, Smith, et al. 2021; Fickling, Poel, et al.  
92 2021).

93 Identification of subconcussive cognitive impairments over a season of contact sports was initially  
94 reported in male Junior-A ice hockey players (Fickling et al. 2019, N=23). Subsequent studies (Fickling,  
95 Smith, et al. 2021, N=23a; Fickling, Poel, et al. 2021, N=15b; Breuer et al. 2023, N=30) replicated and  
96 confirmed identification of accumulated subconcussive exposure in male athletes for different age ranges  
97 (12-14, 16-21, & 21-28, respectively) and different contact sports, including ice hockey, tackle football,  
98 and mixed martial arts. Importantly, this work demonstrated strong, significant, and linearly predictive  
99 relationships between brain vital sign changes and exposure to subconcussive impacts (Fickling, Smith, et  
100 al. 2021; Fickling, Poel, et al. 2021). These relationships were demonstrated both when subconcussive  
101 impacts were quantified directly by impact sensors or indirectly by the number of games and practices  
102 played. A pattern of subconcussive changes have emerged, identified by changes in the N400 (cognitive  
103 processing) and N100 (sensory processing). The N400 and N100 components have been implicated in the  
104 rate of information processing and synchronous pyramidal neural activation (Luck 2014): the two are  
105 interdependent factors reflecting an association with cognitive processing (Kutas and Federmeier 2011)  
106 and auditory sensation (Davis 1939). While the replications of N400 and N100 subconcussive changes in  
107 male athletes are noteworthy, a single prospective study with a large sample size including female athletes  
108 is critical.

109

## 110 Objectives & Hypothesis

111 The study was conducted at Brentwood College School (a Grade 8-12 high school in Mill Bay,  
112 British Columbia, Canada) by student researchers from the Brentwood Research, Action, and Innovation  
113 in Neuroscience (BRAIN) team. Brain vital signs were monitored in 89 female and male high school  
114 students (15-17 years of age) participating in high-contact (e.g. rugby, ice hockey, and soccer) and low-  
115 contact sports (e.g. rowing, climbing, and tennis) over three academic terms across the school year (Figure

## BRENTWOOD Research Study Manuscript

116 1). With respect to matching participants in high-contact versus low-contact sports, Brentwood is a private  
117 boarding school, in which all students follow a structured program with commonly matched ages, daily  
118 schedules, diets, academics, athletics, and sleep routines. The study used a mixed-model, repeated  
119 measures design evaluated across 3 terms before and after each of the three school year terms as well as  
120 after the summer break, resulting in 7 possible scan timepoints. The objectives were to replicate prior  
121 subconcussion findings in male athletes, as well as in female athletes, with the primary hypothesis  
122 predicting that brain vital sign subconcussive differences would be detectable in the comparisons for high-  
123 contact sports relative to low-contact sports. Subsequent analyses were conducted to explore specific  
124 differences between female and male subconcussive and overall neurophysiological results.  
125  
126

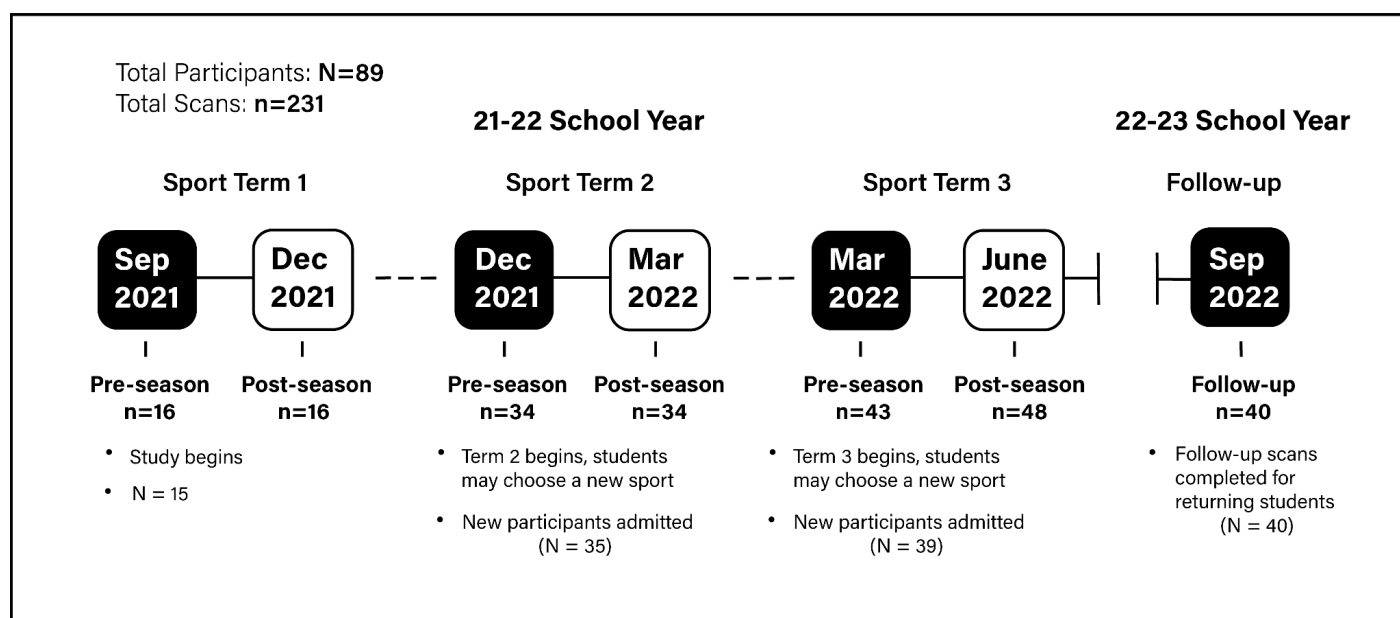

127  
128 **Figure 1:** Overview of the experimental design and study timeline (N: Number of participants; n: brain  
129 vital signs scans completed).  
130  
131

## 132 Results

133  
134 In the current study, 89 female and male student athletes were scanned a total of 231 times  
135 before and after varying terms of contact or non-contact sports. All three brain vital signs, the N100,  
136 P300, and N400, were verified at both the group- and individual- levels. Peak amplitude and latency  
137 values were examined in the multivariate analysis of variance (MANOVA), which were first examined  
138 with univariate tests of normality and Levene's test of equality of error variances. N100 latency and  
139 N400 amplitude failed tests of normality ( $p < 0.05$ ), while all amplitude and latency values passed  
140 Levene's test ( $p > 0.05$ ). Therefore, non-parametric Kruskal-Wallis test results are also included in  
141 Supplemental Data 1 to demonstrate the robustness of the following MANOVA results.  
142

## BRENTWOOD Research Study Manuscript

### 143 High-contact versus low-contact effects:

144 Figure 2a shows brain vital sign differences in the N400 latency and N100 amplitude, while  
145 figure 2b provides the underlying waveform differences. The findings confirmed the consistent  
146 replication of subconcussive changes in the N400 and N100 at the overall group level, with a significant  
147 delay in N400 peak latency and a significant increase in N100 peak amplitude. Specifically, the MANOVA  
148 showed a significant main effect of condition between high- versus low-contact groups [ $F(6,104) = 7.95$ ,  
149  $p < 0.001$ ,  $\eta_p^2 = 0.314$ ] (Table 1). Separate univariate between-subjects tests on the outcome variables  
150 revealed significant effects of group on the N400 latency, [ $F(1) = 35.79$ ,  $p < 0.001$ ,  $\eta_p^2 = 0.247$ ], and N100  
151 amplitude, [ $F(1) = 7.88$ ,  $p = 0.006$ ,  $\eta_p^2 = 0.067$ ] (Figure 2, Table 2). Figure 3 provides the individual scatter  
152 plot data for both the N400 latency and N100 amplitude effects, including means and standard  
153 deviations. The current results addressed the planned high- versus low-contact group comparison to  
154 build on prior pre- versus post- season differences in male athletes. Specific pre- versus post-  
155 comparisons are provided as Supplemental data for comparison (Supplemental Figure 1).

156  
157

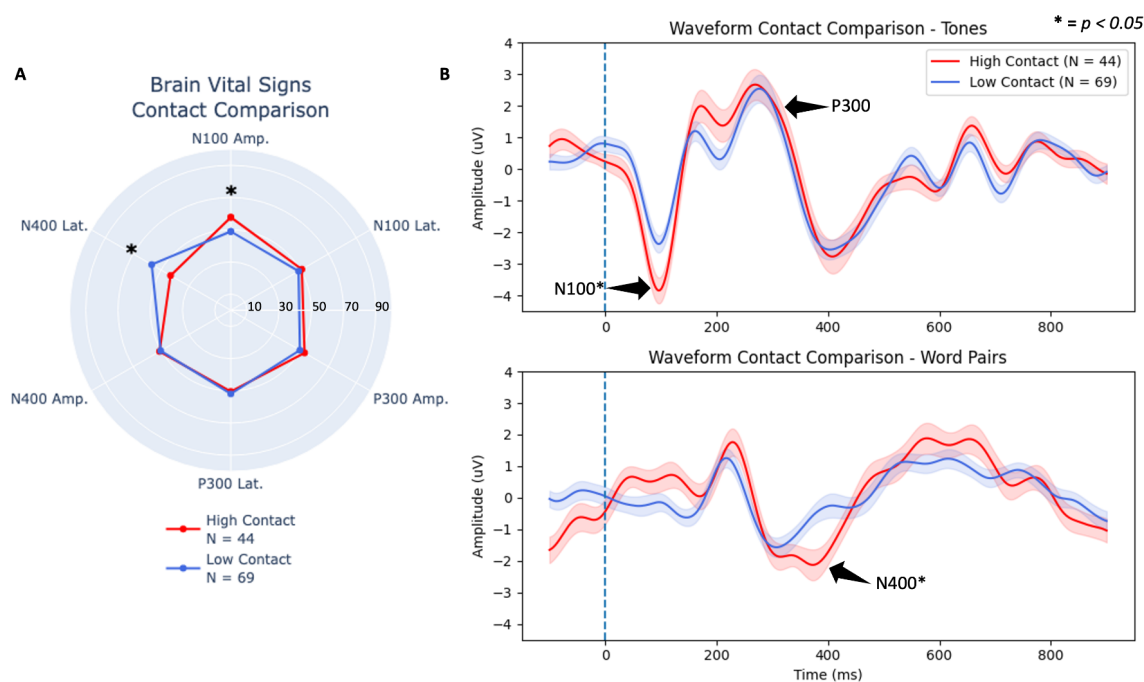

158  
159 **Figure 2: (A):** Overall group (female and male combined) brain vital sign radar plot comparing high-  
160 versus low-contact groups. **(B)** Group-level grand average ERP waveforms from tones (top) and  
161 word pairs (bottom) for overall group comparing high- versus low-contact group differences. Deviant tones  
162 and incongruent word pair waveforms are plotted, with standard error shaded. N100, P300, and N400  
163 brain vital sign components of the high-contact group are highlighted with labels and arrows. Asterisks  
164 denote significant effects in both the brain vital sign and waveform results.

165

166 **Table 1:** MANOVA multivariate effect results for high- and low-contact scans.

BRENTWOOD Research Study  
Manuscript

| MANOVA      | DF     | PILLAI | F-VALUE      | P-VALUE           |
|-------------|--------|--------|--------------|-------------------|
| GROUP       | 6,104  | 0.314  | <b>7.947</b> | <b>&lt;0.001*</b> |
| SEX         | 6, 104 | 0.148  | <b>3.020</b> | <b>0.009*</b>     |
| GROUP X SEX | 6, 104 | 0.003  | 0.047        | 1.000             |

167

168 **Table 2:** MANOVA results for the group effect on each brain vital sign component.

| Brain vital sign | High-contact mean (standard deviation) | Low-contact mean (standard deviation) | F-value       | p-value           |
|------------------|----------------------------------------|---------------------------------------|---------------|-------------------|
| N100 Amplitude   | -4.60 (2.82)                           | -3.15 (2.11)                          | <b>7.883</b>  | <b>0.006*</b>     |
| N100 Latency     | 100.78 (16.58)                         | 100.78 (25.64)                        | 0.750         | 0.388             |
| P300 Amplitude   | 4.52 (2.84)                            | 3.86 (3.26)                           | 0.508         | 0.477             |
| P300 Latency     | 274.77 (40.03)                         | 270.14 (35.22)                        | 0.304         | 0.583             |
| N400 Amplitude   | -3.49 (2.85)                           | -3.35 (2.26)                          | 0.001         | 0.977             |
| N400 Latency     | 433.50 (70.42)                         | 359.16 (57.86)                        | <b>35.786</b> | <b>&lt;0.001*</b> |

169

170

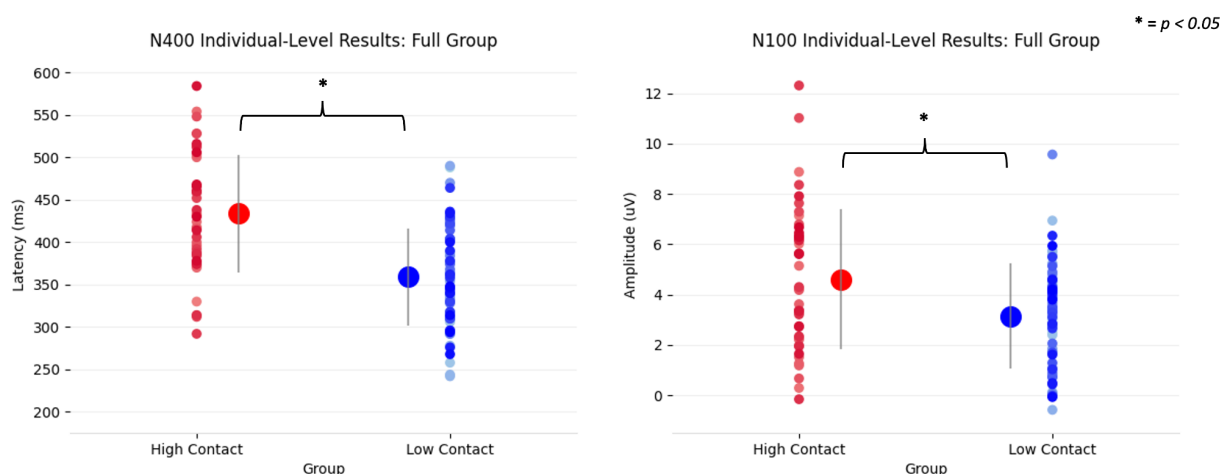

171

172 **Figure 3:** Individual scatter plot data, including group means and standard deviations (middle) showing a  
173 significant N400 latency and N100 amplitude differences for high-contact (red) versus low-contact  
174 (blue).

175

176 Female compared to male subconcussive effects:

177

178

179

180

181

182

183

184

There was no significant sex by contact group interaction present [ $F(6,104) = 0.047, p = 1.00, \eta_p^2 = 0.003$ ] (Table 1), indicating female and male athletes experienced similar subconcussive effects. Figure 4a shows brain vital sign radar plots for female and male athletes for high- versus low-contact and figure 4b provides the corresponding waveform results. The MANOVA confirmed a significant main effect for female athletes compared to male athletes [ $F(6, 104) = 3.02, p = 0.009, \eta_p^2 = 0.148$ ] (Table 1) across these scans. Separate univariate between-subjects tests revealed significant effects for the P300 amplitude [ $F(1) = 7.45, p = 0.007, \eta_p^2 = 0.064$ ] and N400 amplitude [ $F(1) = 4.71, p = 0.032, \eta_p^2 = 0.041$ ] (Table 3). Note in Figure 4b that the vertical y-axis (Amplitude) for female athletes and male athletes is



## BRENTWOOD Research Study Manuscript

185 fixed, highlighting the overall increased response amplitude in female responses relative to male  
186 responses across all peaks.  
187

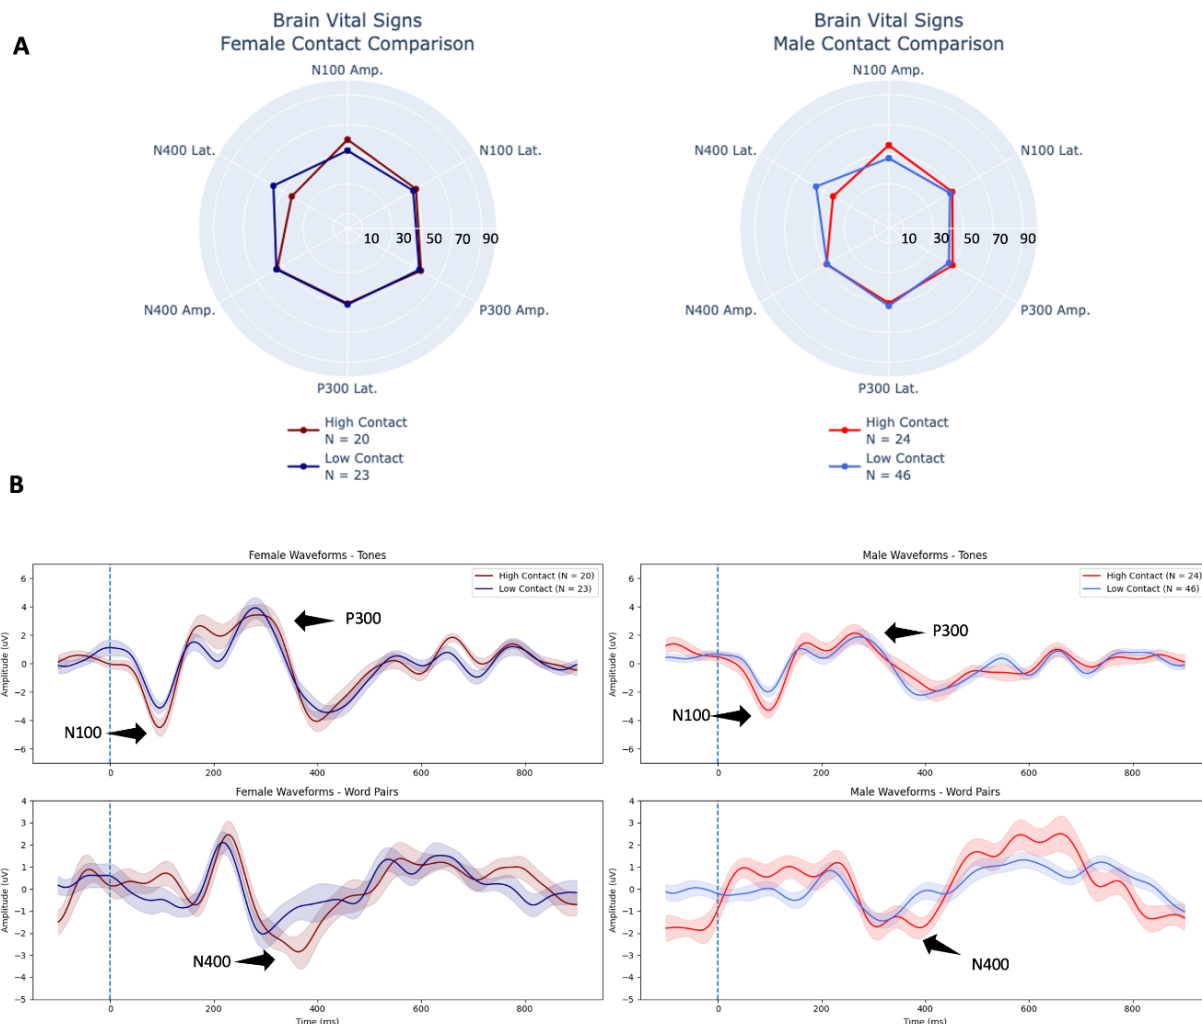

188  
189 **Figure 4:** (A) Radar plots comparing individual-level brain vital signs of the high-contact and low-contact  
190 groups for both female and male athletes. (B) Group-level grand average ERP waveforms from tones  
191 (top) and word pairs (bottom) for female athletes (left, dark shading) and male athletes (right, light  
192 shading) comparing high- versus low-contact group differences. Deviant tones and incongruent word  
193 pair waveforms are plotted (with standard error shading). N100, P300, and N400 brain vital sign  
194 components of the high-contact group are highlighted with labels and arrows. Note in Figure 4b that the  
195 vertical y-axis (Amplitude) for female athletes and male athletes is fixed, highlighting the overall  
196 increased response amplitude in female responses relative to male responses across all peaks.

197  
198  
199 **Table 3:** MANOVA results for the main effect of sex on each brain vital sign component (high- and low-  
200 contact scans).

BRENTWOOD Research Study  
Manuscript

| Brain vital sign component | Female athlete mean (standard deviation) | Male athlete mean (standard deviation) | F-value      | p-value       |
|----------------------------|------------------------------------------|----------------------------------------|--------------|---------------|
| N100 Amplitude             | -4.29 (2.47)                             | -3.36 (2.47)                           | 2.427        | 0.122         |
| N100 Latency               | 94.28 (15.32)                            | 101.86 (25.74)                         | 2.597        | 0.110         |
| P300 Amplitude             | 5.18 (3.24)                              | 3.47 (2.85)                            | <b>7.447</b> | <b>0.007*</b> |
| P300 Latency               | 273.21 (37.50)                           | 271.17 (37.04)                         | 0.025        | 0.874         |
| N400 Amplitude             | -4.07 (2.96)                             | -3.00 (2.08)                           | <b>4.707</b> | <b>0.032*</b> |
| N400 Latency               | 391.67 (78.34)                           | 385.91 (69.232)                        | 0.053        | 0.819         |

201  
202  
203  
204  
205  
206  
207  
208  
209  
210  
211  
212  
213  
214

Female compared to male effects:

To further characterize brain vital sign profiles, the multivariate main effect of sex, and the univariate results above (Table 3) for female and male athletes, contact condition was collapsed across high- and low-contact scans to create Figure 5. P300 and N400 amplitude differences accounts for a significant main effect with a near significant effect in the N100 amplitude. The trends driving the main effect can be seen in Figure 6, which showed the individual scatter plots across female athletes and male athletes, including means and standard deviations. To further characterize female and male effects with a larger and closely weighted group number, Figure 7 provides radar plot and waveform results from female and male athletes for all collected scans (N=202 scans). The purpose of this comparison was to include all scans as an evaluation of robust differences between female and male athletes. Corresponding statistics are in Supplemental Data 3.

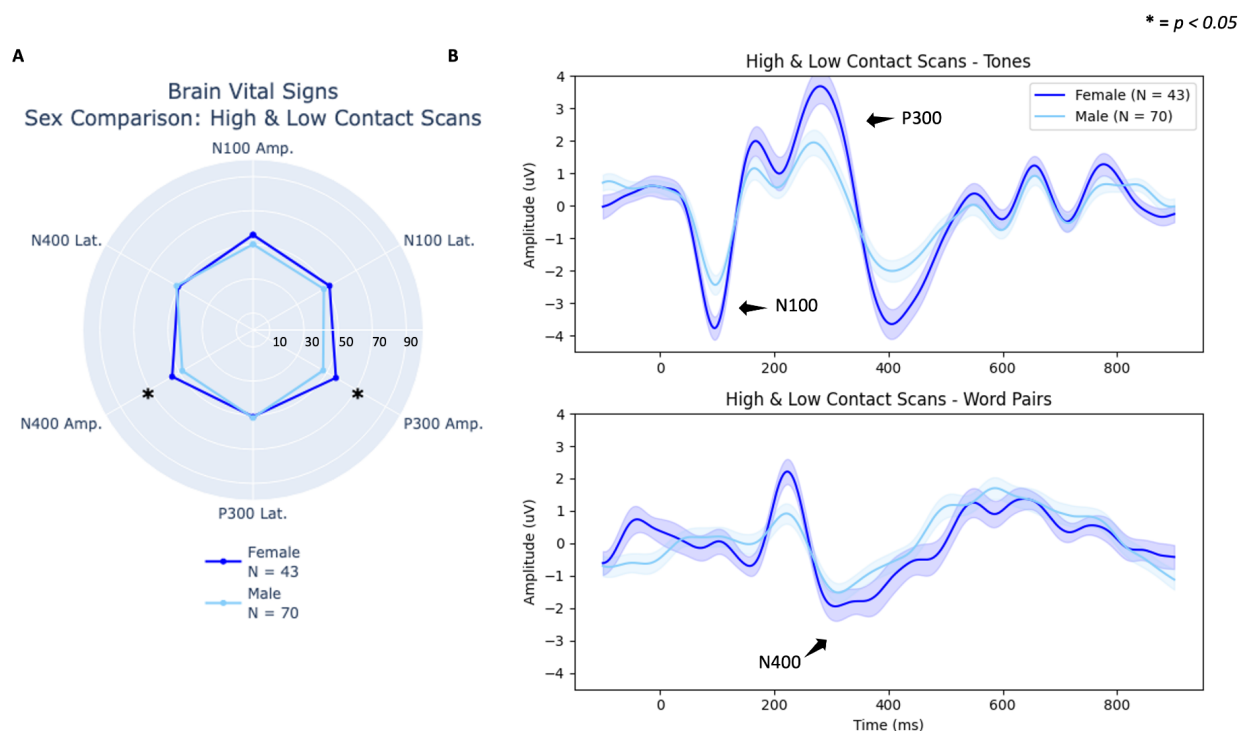

215



## BRENTWOOD Research Study Manuscript

216 **Figure 5:** Comparison of all female and male high- and low-contact scans showing amplitude differences.  
217 **(A)** Radar plot showing overall female and male brain vital sign difference. **(B)** Group-level waveforms  
218 from deviant tones (top) and incongruent word pairs (bottom) are plotted (standard error shading) for  
219 female athletes (dark blue) and male athletes (light blue). N100, P300, and N400 components are  
220 highlighted with arrows.  
221  
222

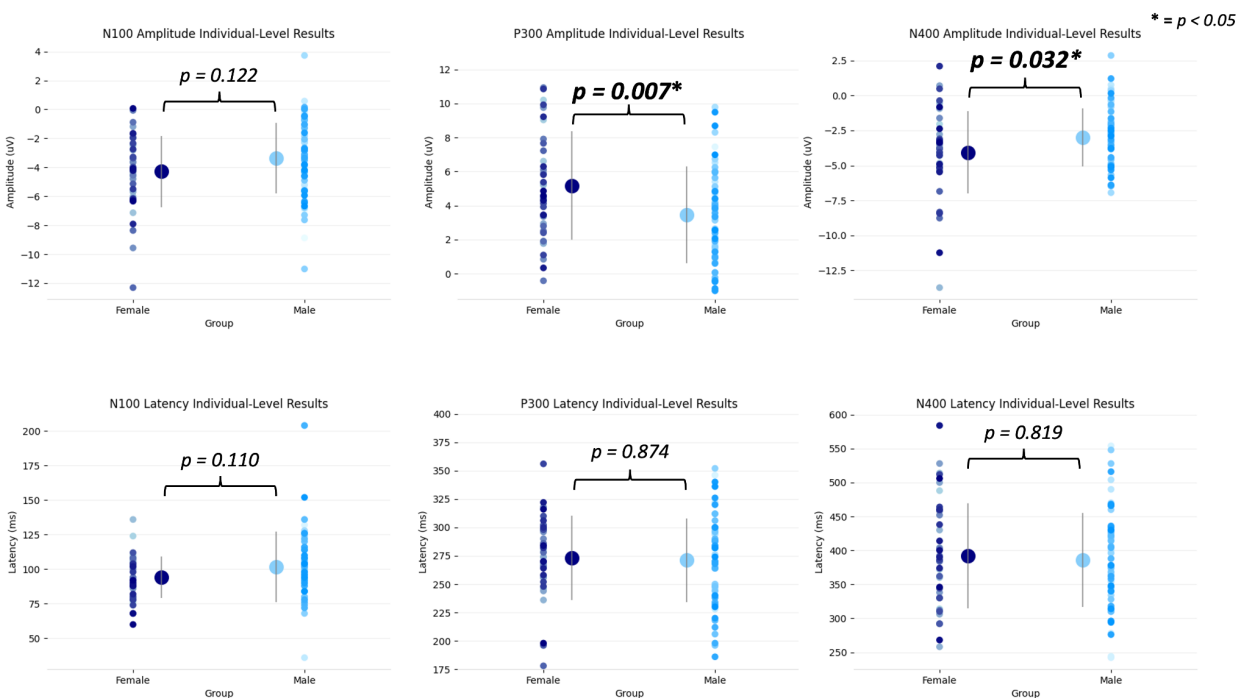

223 **Figure 6:** Scatter plots of individual-level data points for all scans of the amplitudes (top) and latencies  
224 (bottom) for all brain vital signs components in female athletes (left) and male athletes (right).  
225 Significant differences are highlighted by the asterisk, all  $p$ -values are reported as well (Bonferroni  
226 adjusted).  
227  
228  
229

## BRENTWOOD Research Study Manuscript

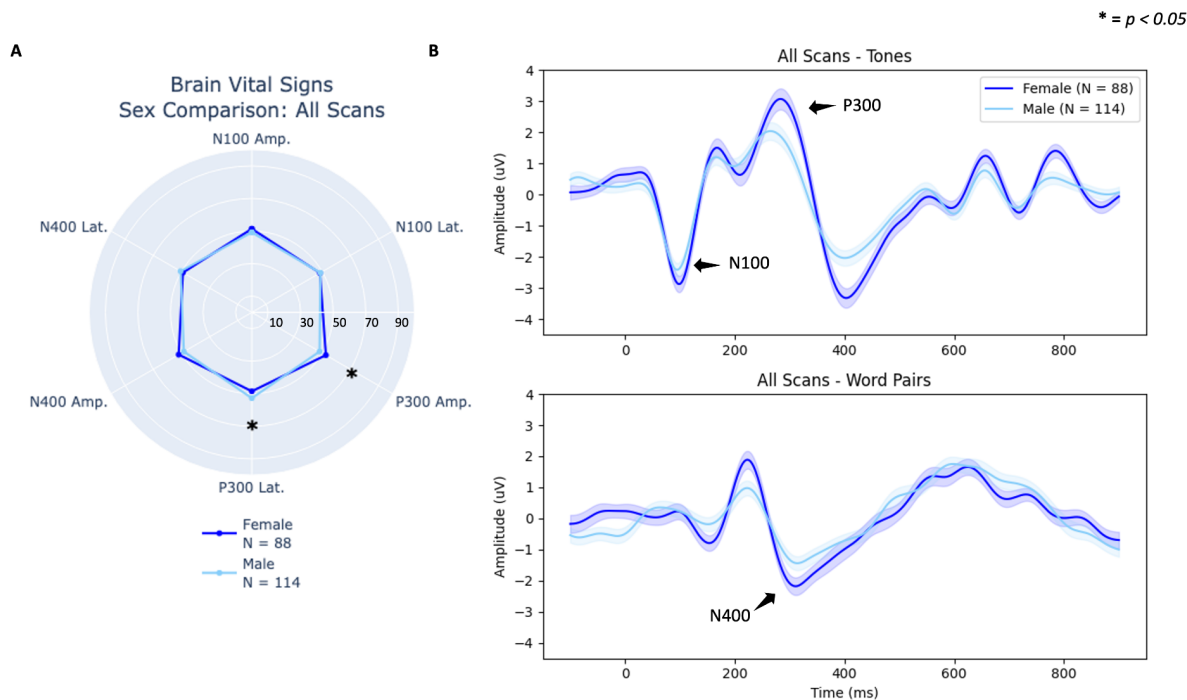

230  
231 **Figure 7:** Comparison of all female and male scans. **(A)** Radar plot showing individual-level brain vital  
232 sign differences across all six components. **(B)** Group-level waveforms from deviant tones (top) and  
233 incongruent word pairs (bottom) are plotted (standard error shading) confirming lower amplitudes in  
234 male athletes (highlighted with arrows).

235  
236 The current analyses examined high- versus low-contact, using equivalent exposure durations to  
237 prior studies. For additional analyses (N=202 scans), contact exposure levels were compared between  
238 low-contact exposure and both a single term and two or more terms of high-contact exposure. These  
239 results were closely consistent with both subconscious and sex effects above and are provided as  
240 Supplemental Data 4.

## 241 242 Discussion

243  
244 The current findings replicated prior studies of subconscious changes in brain vital signs. The  
245 study used a large, prospective, repeated measures design to compare high- versus low-contact exposure  
246 across both female and male athletes. The findings supported the primary hypothesis that prior  
247 subconscious differences in the N400 and N100 would be detectable in a high- versus low- contact  
248 comparison (Figure 2), not only for male athletes but also in female athletes (Figure 4). Additional  
249 comparisons of female and male results showed significantly larger P300 and N400 responses for female  
250 athletes (Figure 6).

251  
252 *Subconcussive analyses*

## BRENTWOOD Research Study Manuscript

253 Subconcussive N400 changes replicate four previous studies on concussion (Fickling et al.  
254 2019; Fickling, Smith, et al. 2021; Fickling, Poel, et al. 2021; Breuer et al. 2023). The N400 is commonly  
255 associated with high-order cognitive semantic processing (D'Arcy et al. 2004; Kutas and Federmeier 2011)  
256 and measures changes in semantic processing, suggesting the initial demonstration of cognitive changes  
257 due to contact (Connolly and D'Arcy 2000; D'Arcy et al. 2003; Gawryluk et al. 2010; Ghosh Hajra et al.  
258 2018). It is noteworthy that these replications have spanned across different sports and age ranges in  
259 male athletes. However, the specific N400 changes have varied with respect to latency delays and/or  
260 amplitude reductions, with the former directly measuring the rate of information processing and the latter  
261 related to synchronous pyramidal neural activation (Luck 2014). The two are interdependent factors  
262 reflecting a relative impairment in cognitive processing. While the initial results for female athletes  
263 showed comparable N400 latency delays, a specific pattern of change in N400 latency versus amplitude  
264 remains to be characterized.

265 Similarly, subconcussive changes in the N100 have been replicated across a number of prior  
266 studies. While the studies have reported only N100 amplitude changes, the direction of the effects has  
267 varied (i.e., decreases, increases, and correlated variability (Fickling et al. 2019; Fickling, Smith, et al. 2021;  
268 Fickling, Poel, et al. 2021). In prior linear regression analyses of the relationship between brain vital signs  
269 and helmet mounted accelerometers, inclusion of the N100 with the N400 provided additional  
270 explanatory variance (Fickling, Poel, et al. 2021). Consequently, N100 changes suggest that subconcussive  
271 impairments can span from lower-level sensory processing to higher level cognitive processing. As with  
272 the N400 above, the common preliminary results showing N100 changes in both female and male athletes  
273 do not rule out the possibility of specific differences. Indeed, examination of the female and male  
274 waveforms shows early sensory and attention differences in other ERP components (see below).

275 Of note, the current findings are the first to compare brain vital signs between high- and low-  
276 contact groups using a between-subjects design. To anchor to prior studies, a direct evaluation of the  
277 within-subjects pre- versus post- design has also demonstrated a significant delay in the N400 latency  
278 (Supplemental Data 2). The contribution of a control group is an important step, with the interpretation  
279 further underpinned by the nature of the closely matched comparison (i.e., related to questions about  
280 whether the effects are indeed attributable to subconcussive impact exposure). The student athletes in  
281 this study attended a private school with full time residence. Accordingly, all students follow a highly  
282 structured daily and weekly schedule, matched across programs, activities, diet, sleep, physical fitness,  
283 rest, and related factors.

284 Another novel aspect of the current study was the ability to begin exploring differences between  
285 a single term versus two or more terms of exposure to subconcussive impacts (Supplemental Data 4).  
286 While preliminary, the findings suggested that there may be a graded effect of exposure on the N400 peak  
287 latency (Supplemental Data 4). These results highlighted important questions related to tracking the  
288 extent of exposure with increased temporal resolution to characterize the changes over time. As reflected  
289 in the study design (Figure 1), a large cohort of these students were also re-evaluated after the summer  
290 break to determine whether this duration of rest resulted in a return to pre- baseline levels following post-  
291 subconcussive changes. Evaluation of these results are currently being analyzed as a follow-up study.  
292 While the emerging subconcussive findings are concerning, the demonstrated utility of using brain vital  
293 signs to objectively identify acute cognitive changes associated with repeated impact exposure has

## BRENTWOOD Research Study Manuscript

294 enabled clinical trials on potential interventions. A recent study on subconcussion focused on a  
295 prospective randomized placebo-controlled trial evaluating the effect of a dietary supplement effects  
296 created to reduce neuroinflammation and support energy production, on brain structure and function in  
297 Junior-A ice hockey players (Breuer et al. 2023). Breuer et al. (2023) randomized players into two groups:  
298 a group that took a supplement containing a combination of non-pharmacological ingredients shown to  
299 support brain health (Synaquell™ - Thorne Research Inc., NY, USA) daily over the season and a placebo  
300 control group who followed the same protocol without supplementation. Multivariate analyses showed  
301 significant neurocognitive pre- to post- season changes in only the control group, with significant negative  
302 impacts on the N100 and N400 along with reduced saccadic eye movement (King-Devick Test) and  
303 neurofilament light chain measures.

304

### 305 *Female and male comparison*

306 Robust P300 and N400 differences between female and male athletes were shown with and  
307 without subconcussive contact exposure as a factor. While the significant P300 and N400 differences  
308 demonstrated larger amplitudes for female athletes, examination of the overall waveforms showed this  
309 finding generally across all ERP responses. There are at least two potential factors related to interpretation  
310 of the difference between female and male athletes. One factor may relate to general attention difference  
311 during the approximately 6-minute test time, whereby female athletes showed increased sustained  
312 attention on average relative to male athletes. In this case, improved sustained attention to the task  
313 would result in a higher signal-to-noise ratio in the signal averaged ERPs and consequently higher response  
314 amplitudes. Alternatively, another factor may relate to a fundamental difference in ERP response size  
315 between female and male individuals. While these two factors are not mutually exclusive, the notable  
316 differences in baseline variance suggested sustained attention during the test time is likely a factor (Figure  
317 5). Differences in attention between female and male participants has been noted in prior literature, but  
318 these results are still mixed (Davidson, Cave, and Sellner 2000; Solianik, Brazaitis, and Skurvydas 2016;  
319 Riley et al. 2016).

320 As mentioned above, despite the subconcussive similarities between female and male athletes, it  
321 is too early to exclude differences, as an “absence of evidence is not evidence of absence.” For instance,  
322 examination of the ERP waveforms (Figure 4) shows noteworthy subconcussive differences in responses  
323 outside of the N100, P300, and N400. In particular, there appears to be a subconcussive reduction in the  
324 N200-P200 difference in female athletes, which is not present in male athletes. The N200-P200 is  
325 associated with early perceptual-attentional processing (Portella et al. 2012; D’Arcy, Connolly, and  
326 Crocker 2000; Patel and Azzam 2005), and further research should explore this in the context of sex-  
327 specific changes in subconcussion and head-impact exposure. With respect to this, the clinical importance  
328 of even small attentional impairments can consequently have a larger impact on high-level processing for  
329 individuals in attention demanding professions. For example, we identified early on in clinical concussion  
330 evaluation that these changes can have a compounding effect on high demand jobs such as air traffic  
331 controllers relative to less attentionally-demanding positions (Mateer and D’Arcy 2000). A comparable  
332 impact may be a consideration for enhanced sustained attention processing in female athletes. Given  
333 recent advances in understanding functional neuroanatomical differences (Andrushko et al. 2023), further  
334 studies needed to better characterize female- versus male- specific subconcussive profiles.

## BRENTWOOD Research Study Manuscript

335

### 336 *Limitations and Future Directions*

337           The current study included data across a large sample made up of smaller subsets across different  
338 sports, with differing contact levels. While this was beneficial to create a large sample size for this study,  
339 larger subsets of groups pertaining to each specific sport would help elucidate sport-specific differences.  
340 Similarly, history of high-contact sport participation and concussion are important variables that may  
341 affect the current state of participants. Nonetheless, the current study is the first in a continuing  
342 investigation that will subsequently focus on specific sports and recovery times following subconcussive  
343 impairment in contact sport. Future studies will expand to focus on recovery effects and differences  
344 following summer break. Also, the current study combined subjects in grades 10-12 in a highly structured  
345 school environment; however, previous work has shown differing neurological developmental rates  
346 between female and male adolescents (Paus 2010; Kaczurkin, Raznahan, and Satterthwaite 2019; Gur  
347 and Gur 2016), which may have been a factor for female and male-specific profiles. Future work will  
348 include larger age subset sizes and longitudinal analyses, as well as controlling for age as a co-variate in  
349 future models, to have a better understanding of developmental differences between female and male  
350 individuals. Finally, the current study did not track important biological factors that differ between female  
351 and male athletes. These factors include but are not limited to menstrual cycle phase at time of exposure  
352 or in the case of multiple exposures, when the majority of exposures occurred (menstrual phase has been  
353 a predictor of mild TBI outcome (Wunderle et al. 2014) and progesterone shows neuroprotective as a TBI  
354 treatment (Wright et al. 2007)); body fat percentages given recent understanding of fat being a major  
355 endocrine organ (Musi and Guardado-Mendoza 2014); and diet given the understanding of diet impact  
356 on inflammation and brain function (Patel et al. 2023; Markovic et al. 2021). With clear neurophysiological  
357 differences identified between females and males, future work must include expanded characterization  
358 of these key biological factors to understand change that may affect results at the time of evaluation.  
359 Lastly, to better understand the resulting effect of these subconcussive neurophysiological changes and  
360 differences, additional study variables should include heart rate variability data to understand clinical and  
361 sub-clinical autonomic dysfunction and time to recovery, as well as changes in sleep and endocrine levels  
362 due to RHI, as TBI may lead to endocrine changes, specifically in developing adolescents (Richmond and  
363 Rogol 2014).

364

### 365 **Conclusion**

366           With increasing attention on subconcussive impairments and potential interventions to limit  
367 future risks (e.g., long-term neuropsychiatric impairment, chronic traumatic encephalopathy – CTE), the  
368 current findings provide a large sample demonstration of subconcussive changes between closely  
369 matched high- versus low-contact student athletes that replicate previous investigations. The findings  
370 provide strong support for continued focus on the role of subconcussive injuries in sport-related brain  
371 health research. Importantly, as this field of study has historically focused on male athletes, inclusion of  
372 female athletes in the current findings represents a critical milestone towards understanding specific  
373 neurophysiological differences before and after exposure to subconcussive impacts. Initial results strongly  
374 support continued investigations that span beyond male athletes in helmeted contact sports.

375

BRENTWOOD Research Study  
Manuscript

376 **Methods**

377  
378 A total of 89 high school students were scanned 231 times over the year (34 females and 55  
379 males). In total, 8 scans were removed due to attrition, 12 scans had a data collection error, failing to  
380 produce scan data, 5 due to dropping all epochs for a condition (i.e. deviant tones), and 4 due to excess  
381 noise (N=202 scans). For analysis and results we ended with N=81, n=202 (33 females and 48 males). The  
382 current study focused on a scan-based between contact groups analysis, instead of a pre-post subject  
383 based within-subjects analysis. I.e. results from a subject scan after a season of low contact sport would  
384 be characterized as a low contact data point (not a benchmark or pre data point), while if that same  
385 subject had a separate scan later in the school year after 2 terms of high contact, that scan would be  
386 characterized as a high contact data point. This was done to maximize the total data point number for  
387 analyses and provide more equal weighting across groups, as opposed to a repeated measure subject-  
388 based analysis including only subjects that had not had any contact immediately prior to the study.

389 All healthy participants were in grades 10 through 12 (age range: 15-17), fluent in English, no  
390 history of concussion in the past 6-months, no self-reported problems with brain function, and had no  
391 hearing problems. All participants were recruited from Brentwood College School athletic programs,  
392 which involve either high-contact (e.g., rugby, ice-hockey, soccer, field hockey, jujitsu, and basketball) or  
393 no-contact/low-contact sports (e.g., rowing, tennis, and climbing) over three distinct three-month terms  
394 in the school year (Fig. 1). As described above, Brentwood is a private boarding school in which all students  
395 follow a structured daily schedule and a similar diet, exercise, and sleep schedule throughout the  
396 academic year. Accordingly, participants were closely matched across a wide number of typical lifestyle  
397 factors. The study had Advarra institutional research ethics board approval and all participants along with  
398 their guardians provided informed consent.

399  
400 **Data Collection**

401 The brain vital sign framework (Ghosh Hajra et al. 2016) was employed with the NeuroCatch®  
402 Platform (Version 1.1), which uses EEG to rapidly extract the N100, P300, and N400 ERPs. All three ERPs  
403 were stimulated using a compressed and standardized auditory stimulus sequence (approximately 6  
404 minutes) consisting of sets of tones and spoken word pairs. The brain vital signs framework utilizes an  
405 oddball paradigm, involving frequent standard tones with infrequent oddball tones, which elicit the N100  
406 and P300 components. The tone stimuli precede word pairs, which are either matched or mismatched  
407 semantically-related word-pair primes (e.g., match: bread-butter; mismatch: bread-window) to elicit the  
408 N400 component. Participants passively listened to the stimuli and decided if the word pairs matched or  
409 mismatched.

410 Participants were fitted with an elasticized cloth cap containing an 8-channel EEG amplifier with  
411 standardized electrode locations (Fz, Cz, & Pz). Three additional electrodes were placed on the  
412 participant's forehead to record the ground (GND) and electrooculogram (vEOG, hEOG) signals. A  
413 reference electrode was clipped to the participant's right earlobe. Standard EEG skin preparation (70%  
414 isopropyl alcohol wipes) and conductive gel products (SignaGel) were used to ensure appropriate contact  
415 for all EEG sensors. Distractions were mitigated by performing the scans in a quiet and closed classroom.



## BRENTWOOD Research Study Manuscript

416 The same environment was used for all scans. Participants were asked to listen attentively to the stimuli,  
417 but no active response was required. To reduce motor and ocular artifacts, participants were instructed  
418 to sit motionlessly, and maintain visual fixation on a cross positioned at eye level 2 m away.

419  
420

### 421 Data Processing

422 The NeuroCatch® Platform was calibrated for any trigger latency delays. The most common delay  
423 was identified and applied to shift all trigger data. EEG data were processed using a fourth order  
424 Butterworth filter (0.5-10 Hz) and a Notch filter (60 Hz). Adaptive filtering using electrooculogram  
425 channels was used to correct for ocular artifacts. EEG was epoched based on stimulus events using an  
426 epoch from -100ms pre-stimulus to 1000ms post-stimulus. All epochs were linearly detrended and any  
427 epochs with noise exceeding  $\pm 75\mu\text{V}$  were rejected. N100, P300, and N400 peaks were calculated using  
428 the maximal peak within a standard temporal window and manually verified. Amplitude and latency  
429 metrics from these peaks were then linearly transformed into standardized scores on a scale from 0 to  
430 100, derived from entire group means (Fickling et al. 2019). All preprocessing was completed in Python  
431 using the Scipy and MNE libraries.

432  
433

### 434 Statistical Analysis

435 All individual-level statistical analyses of peak amplitude and latencies were performed using  
436 SPSS (Version 29.0.0, IBM, NY, USA). In the current study, individual-level can be defined as amplitudes  
437 and latencies from each individual scan data, not derived from the group-level average waveforms. To  
438 assess differences in brain vital signs between contact groups and sex, brain vital sign scores were  
439 compared using a multivariate analysis of variance (MANOVA) (**Between:** Group: low-contact and high-  
440 contact; Sex: Female and Male) on N100, P300, and N400 amplitudes and latencies for only scans  
441 characterized as low-contact or high-contact for two or more terms. To further assess differences in  
442 brain vital signs between sex in a larger number of scans, brain vital sign scores were compared using a  
443 multivariate analysis of variance (MANOVA) (**Between:** Sex: Female and Male) on N100, P300, and N400  
444 amplitudes and latencies for all 202 scans collected. All univariate results are adjusted for multiple  
445 comparisons using Bonferroni adjustment. All statistics were also rerun only with subjects with less than  
446 50% of epochs dropped (12 of 202 scans dropped) due to the  $75\mu\text{V}$  thresholding measures mentioned  
447 above. To keep our participant number large and because the analysis resulted in very similar outcomes,  
448 the current manuscript reports the statistics from the full group data, including subjects with more than  
449 50% of epochs dropped.

450  
451

### 452 Acknowledgements

453

## BRENTWOOD Research Study Manuscript

454           The authors would like to acknowledge the important leadership of Dr. Aynsley Smith (Mayo  
455 Clinic, retired), whose passionate leadership for research advances in sports-related concussion and  
456 ever-lasting priority to translate research advances to young females and males served as an important  
457 inspiration for this study. The authors would also like to acknowledge the technical assistance by Joshua  
458 Ighalo and the assistance in data collection by Laila Reed.  
459

## 460 Funding

461           This work has been supported in part by funding from the Natural Sciences and Engineering  
462 Research Council of Canada (Discovery Grant, PI R.C.N. D'Arcy; CGS M, E.D. Kirby).  
463

## 464 Competing interests

465           Some of the authors (EDK, TY, NYB, SDF, RCND) have financial and/or business interests in  
466 HealthTech Connex Inc., which may be affected by the research reported in this paper. Over the past 36  
467 months, DWD reports the following competing interests: Consulting: Amgen, Atria, CapiThera Ltd.,  
468 Cerecin, Ceruvia Lifesciences LLC, CoolTech, Ctrl M, Allergan, AbbVie, Biohaven, GlaxoSmithKline,  
469 Lundbeck, Eli Lilly, Novartis, Impel, Satsuma, Theranica, WL Gore, Genentech, Nocira, Perfood, Praxis,  
470 AYYA Biosciences, Revance, Pfizer. Honoraria: American Academy of Neurology, Headache Cooperative  
471 of the Pacific, Canadian Headache Society, MF Med Ed Research, Biopharm Communications, CEA Group  
472 Holding Company (Clinical Education Alliance LLC), Teva (speaking), Amgen (speaking), Eli Lilly  
473 (speaking), Lundbeck (speaking), Pfizer (speaking), Vector Psychometric Group, Clinical Care Solutions,  
474 CME Outfitters, Curry Rockefeller Group, DeepBench, Global Access Meetings, KLJ Associates, Academy  
475 for Continued Healthcare Learning, Majallin LLC, Medlogix Communications, Medica Communications  
476 LLC, MJH Lifesciences, Miller Medical Communications, WebMD Health/Medscape, Wolters Kluwer,  
477 Oxford University Press, Cambridge University Press. Non-profit board membership: American Brain  
478 Foundation, American Migraine Foundation, ONE Neurology, Precon Health Foundation, International  
479 Headache Society Global Patient Advocacy Coalition, Atria Health Collaborative, Arizona Brain Injury  
480 Alliance, Domestic Violence HOPE Foundation/Panfila. Research support: Department of Defense,  
481 National Institutes of Health, Henry Jackson Foundation, Sperling Foundation, American Migraine  
482 Foundation, Henry Jackson Foundation, Patient Centered Outcomes Research Institute (PCORI). Stock  
483 options/shareholder/patents/board of directors: Aural analytics (options), Axon Therapeutics, ExSano  
484 (options), Palion (options), Man and Science, Healint (options), Theranica (options), Second  
485 Opinion/Mobile Health (options), Epien (options/board), Nocira (options), Matterhorn (shares/board),  
486 Ontologics (shares/board), King-Devick Technologies (options/board), Precon Health (options/board),  
487 AYYA Biosciences (options), Axon Therapeutics (options/board), Cephalgia Group (options/board), Atria  
488 Health (options/employee). Patent 17189376.1-1466:vTitle: Onabotulinum Toxin Dosage Regimen for  
489 Chronic Migraine Prophylaxis (Non-royalty bearing). Patent application submitted: Synaquell® (Precon  
490 Health).  
491

## 492 Author Contributions

493

BRENTWOOD Research Study  
Manuscript

494 RCND assisted with project study design, manuscript drafting, and acted as lab PI. DM  
495 contributed with data collection and project study design. DH contributed with data collection, data  
496 processing, and manuscript editing. ZL contributed with data collection and manuscript editing. JW  
497 contributed with data collection and manuscript editing. AH contributed with data collection, statistical  
498 analysis, and manuscript editing. EDK contributed with data processing, statistical analysis, and  
499 manuscript drafting. TY, NYB, SDF, TAM, DD, CA, and KSS contributed with manuscript editing.

500

## 501 References

502

- 503 Andrushko, Justin W., Shie Rinat, Eric D. Kirby, Julia Dahlby, Chelsea Ekstrand, and Lara A.  
504 Boyd. 2023. "Females Exhibit Smaller Volumes of Brain Activation and Lower Inter-  
505 Subject Variability during Motor Tasks." *Scientific Reports* 13 (1): 17698.  
506 <https://doi.org/10.1038/s41598-023-44871-4>.
- 507 Breuer, Logan T., Shaun D. Fickling, David A. Krause, Ryan C. N. D'Arcy, Tory O. Frizzell,  
508 Tania Gendron, and Michael J. Stuart. 2023. "The Effects of a Dietary Supplement on  
509 Brain Function and Structure in Junior A Ice Hockey Players: A Prospective Randomized  
510 Trial." medRxiv. <https://doi.org/10.1101/2023.04.03.23288079>.
- 511 Connolly, John F, and Ryan C. N D'Arcy. 2000. "Innovations in Neuropsychological Assessment  
512 Using Event-Related Brain Potentials." *International Journal of Psychophysiology* 37 (1):  
513 31–47. [https://doi.org/10.1016/S0167-8760\(00\)00093-3](https://doi.org/10.1016/S0167-8760(00)00093-3).
- 514 D'Arcy, Ryan C. N, John F Connolly, and Susan F Crocker. 2000. "Latency Shifts in the N2b  
515 Component Track Phonological Deviations in Spoken Words." *Clinical Neurophysiology*  
516 111 (1): 40–44. [https://doi.org/10.1016/S1388-2457\(99\)00210-2](https://doi.org/10.1016/S1388-2457(99)00210-2).
- 517 D'Arcy, Ryan C. N, Yannick Marchand, Gail A Eskes, Edmund R Harrison, Stephen J Phillips,  
518 Alma Major, and John F Connolly. 2003. "Electrophysiological Assessment of Language  
519 Function Following Stroke." *Clinical Neurophysiology* 114 (4): 662–72.  
520 [https://doi.org/10.1016/S1388-2457\(03\)00007-5](https://doi.org/10.1016/S1388-2457(03)00007-5).
- 521 D'Arcy, Ryan C.N., John F. Connolly, Elisabet Service, Colin S. Hawco, and Michael E.  
522 Houlihan. 2004. "Separating Phonological and Semantic Processing in Auditory  
523 Sentence Processing: A High-Resolution Event-Related Brain Potential Study." *Human*  
524 *Brain Mapping*. <https://doi.org/10.1002/hbm.20008>.
- 525 Davidson, Heather, Kyle R Cave, and Daniela Sellner. 2000. "Differences in Visual Attention  
526 and Task Interference between Males and Females Reflect Differences in Brain  
527 Laterality." *Neuropsychologia* 38 (4): 508–19. [https://doi.org/10.1016/S0028-3932\(99\)00084-6](https://doi.org/10.1016/S0028-3932(99)00084-6).
- 529 Davis, P. A. 1939. "Effects of Acoustic Stimuli on the Waking Human Brain." *Journal of*  
530 *Neurophysiology* 2 (6): 494–99. <https://doi.org/10.1152/jn.1939.2.6.494>.
- 531 Dioso, Emma, John Cerillo, Mohammed Azab, Devon Foster, Isaac Smith, Owen Leary, Michael  
532 Goutnik, and Brandon Lucke-Wold. 2022. "Subconcussion, Concussion, and Cognitive  
533 Decline: The Impact of Sports Related Collisions." *Journal of Medical Research and*  
534 *Surgery* 3 (4): 54–63. <https://doi.org/10.52916/jmrs224081>.
- 535 Fickling, Shaun D, Daniel N Poel, Jason C Dorman, Ryan C N D'Arcy, and Thayne A Munce.  
536 2021. "Subconcussive Changes in Youth Football Players: Objective Evidence Using  
537 Brain Vital Signs and Instrumented Accelerometers." *Brain Communications* 4 (2):  
538 fcab286. <https://doi.org/10.1093/braincomms/fcab286>.
- 539 Fickling, Shaun D., Aynsley M. Smith, Gabriela Pawlowski, Sujoy Ghosh Hajra, Careesa C. Liu,  
540 Kyle Farrell, Janelle Jorgensen, Xiaowei Song, Michael J. Stuart, and Ryan C.N. D'Arcy.

BRENTWOOD Research Study

Manuscript

- 541 2019. "Brain Vital Signs Detect Concussion-Related Neurophysiological Impairments in  
542 Ice Hockey." *Brain* 142 (2): 255–62. <https://doi.org/10.1093/brain/awy317>.
- 543 Fickling, Shaun D, Aynsley M Smith, Michael J Stuart, David W Dodick, Kyle Farrell, Sara C  
544 Pender, and Ryan C N D'Arcy. 2021. "Subconcussive Brain Vital Signs Changes Predict  
545 Head-Impact Exposure in Ice Hockey Players." *Brain Communications* 3 (2): fcab019.  
546 <https://doi.org/10.1093/braincomms/fcab019>.
- 547 Gawryluk, Jodie R., Ryan C.N. D'Arcy, John F. Connolly, and Donald F. Weaver. 2010.  
548 "Improving the Clinical Assessment of Consciousness with Advances in  
549 Electrophysiological and Neuroimaging Techniques." *BMC Neurology*.  
550 <https://doi.org/10.1186/1471-2377-10-11>.
- 551 Ghosh Hajra, Sujoy, Careesa C. Liu, Xiaowei Song, Shaun D. Fickling, Teresa P. L. Cheung,  
552 and Ryan C. N. D'Arcy. 2018. "Multimodal Characterization of the Semantic N400  
553 Response within a Rapid Evaluation Brain Vital Sign Framework." *Journal of  
554 Translational Medicine* 16 (June): 151. <https://doi.org/10.1186/s12967-018-1527-2>.
- 555 Ghosh Hajra, Sujoy, Careesa C. Liu, Xiaowei Song, Shaun Fickling, Luke E. Liu, Gabriela  
556 Pawlowski, Janelle K. Jorgensen, et al. 2016. "Developing Brain Vital Signs: Initial  
557 Framework for Monitoring Brain Function Changes Over Time." *Frontiers in  
558 Neuroscience* 10. <https://www.frontiersin.org/article/10.3389/fnins.2016.00211>.
- 559 Gur, Raquel E., and Ruben C. Gur. 2016. "Sex Differences in Brain and Behavior in  
560 Adolescence: Findings from the Philadelphia Neurodevelopmental Cohort."  
561 *Neuroscience & Biobehavioral Reviews*, The Adolescent Brain, 70 (November): 159–70.  
562 <https://doi.org/10.1016/j.neubiorev.2016.07.035>.
- 563 Guskiewicz, Kevin M., Stephen W. Marshall, Julian Bailes, Michael McCrea, Robert C. Cantu,  
564 Christopher Randolph, and Barry D. Jordan. 2005. "Association between Recurrent  
565 Concussion and Late-Life Cognitive Impairment in Retired Professional Football  
566 Players." *Neurosurgery* 57 (4): 719.  
567 <https://doi.org/10.1227/01.NEU.0000175725.75780.DD>.
- 568 Hirad, Adnan A., Jeffrey J. Bazarian, Kian Merchant-Borna, Frank E. Garcea, Sarah  
569 Heilbronner, David Paul, Eric B. Hintz, et al. 2019. "A Common Neural Signature of Brain  
570 Injury in Concussion and Subconcussion." *Science Advances* 5 (8): eaau3460.  
571 <https://doi.org/10.1126/sciadv.aau3460>.
- 572 Kaczurkin, Antonia N., Armin Raznahan, and Theodore D. Satterthwaite. 2019. "Sex  
573 Differences in the Developing Brain: Insights from Multimodal Neuroimaging."  
574 *Neuropsychopharmacology* 44 (1): 71–85. <https://doi.org/10.1038/s41386-018-0111-z>.
- 575 Kutas, Marta, and Kara D. Federmeier. 2011. "Thirty Years and Counting: Finding Meaning in  
576 the N400 Component of the Event-Related Brain Potential (ERP)." *Annual Review of  
577 Psychology*. <https://doi.org/10.1146/annurev.psych.093008.131123>.
- 578 Luck, Steven J. 2014. *An Introduction to the Event-Related Potential Technique, Second  
579 Edition*. MIT Press.
- 580 Mainwaring, Lynda, Kaleigh M. Ferdinand Pennock, Sandhya Mylabathula, and Benjamin Z.  
581 Alavie. 2018. "Subconcussive Head Impacts in Sport: A Systematic Review of the  
582 Evidence." *International Journal of Psychophysiology*, Long-term outcomes of sport-  
583 related brain injuries: A psychophysiological perspective, 132 (October): 39–54.  
584 <https://doi.org/10.1016/j.ijpsycho.2018.01.007>.
- 585 Markovic, Shaun J., Melinda Fitzgerald, Jeremiah J. Peiffer, Brendan R. Scott, Stephanie R.  
586 Rainey-Smith, Hamid R. Sohrabi, and Belinda M. Brown. 2021. "The Impact of Exercise,  
587 Sleep, and Diet on Neurocognitive Recovery from Mild Traumatic Brain Injury in Older  
588 Adults: A Narrative Review." *Ageing Research Reviews* 68 (July): 101322.  
589 <https://doi.org/10.1016/j.arr.2021.101322>.



## BRENTWOOD Research Study

### Manuscript

- 590 Mateer, Catherine A., and Ryan C. N. D'Arcy. 2000. "Current Concepts in Assessment and  
591 Management." In *Neuropsychological Management of Mild Traumatic Brain Injury*, edited  
592 by Sarah A. Raskin and Catherine A. Mateer. New York, NY, USA: Oxford University  
593 Press.
- 594 McKee, Ann C., Robert C. Cantu, Christopher J. Nowinski, E. Tessa Hedley-Whyte, Brandon E.  
595 Gavett, Andrew E. Budson, Veronica E. Santini, Hyo-Soon Lee, Caroline A. Kubilus, and  
596 Robert A. Stern. 2009. "Chronic Traumatic Encephalopathy in Athletes: Progressive  
597 Tauopathy After Repetitive Head Injury." *Journal of Neuropathology & Experimental*  
598 *Neurology* 68 (7): 709–35. <https://doi.org/10.1097/NEN.0b013e3181a9d503>.
- 599 Miller, Jeff, Rolf Ulrich, and Wolfgang Schwarz. 2009. "Why Jackknifing Yields Good Latency  
600 Estimates." *Psychophysiology* 46 (2): 300–312. [https://doi.org/10.1111/j.1469-](https://doi.org/10.1111/j.1469-8986.2008.00761.x)  
601 [8986.2008.00761.x](https://doi.org/10.1111/j.1469-8986.2008.00761.x).
- 602 Musi, Nicolas, and Rodolfo Guardado-Mendoza. 2014. "Chapter 14 - Adipose Tissue as an  
603 Endocrine Organ." In *Cellular Endocrinology in Health and Disease*, edited by Alfredo  
604 Ulloa-Aguirre and P. Michael Conn, 229–37. Boston: Academic Press.  
605 <https://doi.org/10.1016/B978-0-12-408134-5.00014-7>.
- 606 Nowak, Madeleine K., Zachary W. Bevilacqua, Keisuke Ejima, Megan E. Huibregtse, Zhongxue  
607 Chen, Timothy D. Mickleborough, Sharlene D. Newman, and Keisuke Kawata. 2020.  
608 "Neuro-Ophthalmologic Response to Repetitive Subconcussive Head Impacts: A  
609 Randomized Clinical Trial." *JAMA Ophthalmology* 138 (4): 350–57.  
610 <https://doi.org/10.1001/jamaophthalmol.2019.6128>.
- 611 Patel, Palak R., Patrick Armistead-Jehle, Nicholas R. Eltman, Kelly M. Heath, David X. Cifu, and  
612 Randel L. Swanson. 2023. "Brain Injury: How Dietary Patterns Impact Long-Term  
613 Outcomes." *Current Physical Medicine and Rehabilitation Reports* 11 (3): 367–76.  
614 <https://doi.org/10.1007/s40141-023-00413-7>.
- 615 Patel, Salil H., and Pierre N. Azzam. 2005. "Characterization of N200 and P300: Selected  
616 Studies of the Event-Related Potential." *International Journal of Medical Sciences* 2 (4):  
617 147–54.
- 618 Paus, Tomáš. 2010. "Chapter 2 - Sex Differences in the Human Brain: A Developmental  
619 Perspective." In *Progress in Brain Research*, edited by Ivanka Savic, 186:13–28. Sex  
620 Differences in the Human Brain, Their Underpinnings and Implications. Elsevier.  
621 <https://doi.org/10.1016/B978-0-444-53630-3.00002-6>.
- 622 Portella, Claudio, Sergio Machado, Oscar Arias-Carrión, Alexander T. Sack, Julio Guilherme  
623 Silva, Marco Orsini, Marco Antonio Araujo Leite, et al. 2012. "Relationship Between  
624 Early and Late Stages of Information Processing: An Event-Related Potential Study."  
625 *Neurology International* 4 (3): e16. <https://doi.org/10.4081/ni.2012.e16>.
- 626 Richmond, Erick, and Alan D. Rogol. 2014. "Traumatic Brain Injury: Endocrine Consequences in  
627 Children and Adults." *Endocrine* 45 (1): 3–8. <https://doi.org/10.1007/s12020-013-0049-1>.
- 628 Riley, Elizabeth, Hidefusa Okabe, Laura Germine, Jeremy Wilmer, Michael Esterman, and  
629 Joseph DeGutis. 2016. "Gender Differences in Sustained Attentional Control Relate to  
630 Gender Inequality across Countries." *PLoS ONE* 11 (11): e0165100.  
631 <https://doi.org/10.1371/journal.pone.0165100>.
- 632 Saghafi, Behrouz, Gowtham Murugesan, Elizabeth Davenport, Ben Wagner, Jillian Urban,  
633 Mireille Kelley, Derek Jones, et al. 2018. "Quantifying the Association between White  
634 Matter Integrity Changes and Subconcussive Head Impact Exposure from a Single  
635 Season of Youth and High School Football Using 3D Convolutional Neural Networks."  
636 *Proceedings of SPIE--the International Society for Optical Engineering* 10575  
637 (February): 105750E. <https://doi.org/10.1117/12.2293023>.
- 638 Smulders, Fren T. Y. 2010. "Simplifying Jackknifing of ERPs and Getting More out of It:  
639 Retrieving Estimates of Participants' Latencies." *Psychophysiology* 47 (2): 387–92.

BRENTWOOD Research Study

Manuscript

- 640 <https://doi.org/10.1111/j.1469-8986.2009.00934.x>.
- 641 Snedaker, Katherine Price, Jennifer P. Lundine, Angela H. Ciccio, Mohammad Nadir Haider,  
642 and Katy H. O'Brien. 2022. "Gaps in Concussion Management across School-Aged  
643 Children." *Brain Injury* 36 (6): 714–21. <https://doi.org/10.1080/02699052.2022.2034954>.
- 644 Solianik, Rima, Marius Brazaitis, and Albertas Skurvydas. 2016. "Sex-Related Differences in  
645 Attention and Memory." *Medicina* 52 (6): 372–77.  
646 <https://doi.org/10.1016/j.medic.2016.11.007>.
- 647 Sutton, Samuel, Patricia Tueting, Joseph Zubin, and E. R. John. 1967. "Information Delivery  
648 and the Sensory Evoked Potential." *Science* 155 (3768): 1436–39.  
649 <https://doi.org/10.1126/science.155.3768.1436>.
- 650 Ulrich, Rolf, and Jeff Miller. 2001. "Using the Jackknife-Based Scoring Method for Measuring  
651 LRP Onset Effects in Factorial Designs." *Psychophysiology* 38 (5): 816–27.  
652 <https://doi.org/10.1111/1469-8986.3850816>.
- 653 Valera, Eve M., Annie-Lori C. Joseph, Katherine Snedaker, Matthew J. Breiding, Courtney L.  
654 Robertson, Angela Colantonio, Harvey Levin, et al. 2021. "Understanding Traumatic  
655 Brain Injury in Females: A State-of-the-Art Summary and Future Directions." *The Journal*  
656 *of Head Trauma Rehabilitation* 36 (1): E1–17.  
657 <https://doi.org/10.1097/HTR.0000000000000652>.
- 658 Veksler, Ronel, Udi Vazana, Yonatan Serlin, Ofer Prager, Jonathan Ofer, Nofar Shemen,  
659 Andrew M Fisher, et al. 2020. "Slow Blood-to-Brain Transport Underlies Enduring Barrier  
660 Dysfunction in American Football Players." *Brain* 143 (6): 1826–42.  
661 <https://doi.org/10.1093/brain/awaa140>. Markovic, Shaun J., Melinda Fitzgerald, Jeremiah  
662 J. Peiffer, Brendan R. Scott, Stephanie R. Rainey-Smith, Hamid R. Sohrabi, and Belinda  
663 M. Brown. 2021. "The Impact of Exercise, Sleep, and Diet on Neurocognitive Recovery  
664 from Mild Traumatic Brain Injury in Older Adults: A Narrative Review." *Ageing Research*  
665 *Reviews* 68 (July): 101322. <https://doi.org/10.1016/j.arr.2021.101322>.
- 666 Wright, David W., Arthur L. Kellermann, Vicki S. Hertzberg, Pamela L. Clark, Michael Frankel,  
667 Felicia C. Goldstein, Jeffrey P. Salomone, et al. 2007. "ProTECT: A Randomized Clinical  
668 Trial of Progesterone for Acute Traumatic Brain Injury." *Annals of Emergency Medicine*  
669 49 (4): 391-402.e2. <https://doi.org/10.1016/j.annemergmed.2006.07.932>.
- 670 Wunderle, Kathryn, Kathleen M. Hoeger, Erin Wasserman, and Jeffrey J. Bazarian. 2014.  
671 "Menstrual Phase as Predictor of Outcome After Mild Traumatic Brain Injury in Women."  
672 *The Journal of Head Trauma Rehabilitation* 29 (5): E1.  
673 <https://doi.org/10.1097/HTR.0000000000000006>.
- 674
